# Supplementary material for: Weighted Correlation Gene Network Analysis Reveals New Potential Mechanisms and Biomarkers in Non-obstructive Azoospermia
Source: Front Genet. 2021 Mar 31;12:617133. doi: 10.3389/fgene.2021.617133 (PMC8044582; doi:10.3389/fgene.2021.617133)
Supplement: Supplementary file 1 [file Table_1.CSV]

sup table 1, Differential expression analysis of GSE9210
ID	adj.P.Val	P.Value	t	B	logFC	Gene.symbol	Gene.title
11035	5.93E-25	4.44E-29	-21.5197844	55.92905	-2.49032714	CCDC126	coiled-coil domain containing 126
18486	5.93E-25	6.19E-29	-21.3799802	55.60336	-1.93722711	PRSS37	protease, serine 37
20421	8.10E-25	1.27E-28	-21.3573258	54.89984	-1.6752013	CATSPER3	cation channel sperm associated 3
14435	9.37E-25	1.96E-28	-20.9005317	54.47275	-2.74009147	ACSBG2	acyl-CoA synthetase bubblegum family member 2
12189	3.15E-24	8.61E-28	-20.5526906	53.01871	-1.82342061	MFAP3L	microfibrillar associated protein 3 like
10845	3.15E-24	9.86E-28	-21.352098	52.89418	-2.69962785	TEX29	testis expressed 29
9689	5.31E-24	1.94E-27	-19.9692891	52.21446	-1.56733486	UBQLNL	ubiquilin-like
5102	6.08E-24	2.54E-27	-19.8626242	51.95039	-1.82373413	GLRX2	glutaredoxin 2
9138	1.10E-23	5.17E-27	-19.8209187	51.25464	-1.63254748	TNKS	tankyrase
9723	1.12E-23	5.87E-27	-20.020889	51.1352	-2.57110935	RNF151	ring finger protein 151
7417	2.72E-23	1.56E-26	-19.1508163	50.15882	-1.62358886	SKAP2	src kinase associated phosphoprotein 2
15783	2.85E-23	1.79E-26	-19.0991218	50.02669	-1.89129932	DNAJC5B	DnaJ heat shock protein family (Hsp40) member C5 beta
13210	3.16E-23	2.14E-26	-19.2544378	49.85274	-2.65686454	BCL2L14	BCL2 like 14
8466	5.91E-23	4.63E-26	-18.9528129	49.09297	-2.39864909	7-Mar	membrane associated ring-CH-type finger 7
18355	8.70E-23	7.65E-26	-18.9835648	48.60486	-1.88581074	C4orf17	chromosome 4 open reading frame 17
6570	8.70E-23	7.72E-26	-18.7544643	48.5882	-2.19024254	FAM46C	family with sequence similarity 46 member C
6976	1.19E-22	1.18E-25	-18.5900846	48.16675	-1.60382576	EXOC5	exocyst complex component 5
1016	1.28E-22	1.34E-25	-18.7632527	48.05342	-2.69370647	ANKEF1	ankyrin repeat and EF-hand domain containing 1
9149	1.71E-22	2.04E-25	-19.3206748	47.65969	-2.79499775	FEM1B	fem-1 homolog B
3031	1.71E-22	1.96E-25	-17.9954683	47.65182	-2.11018571	UBR7	ubiquitin protein ligase E3 component n-recognin 7 (putative)
19448	1.71E-22	2.05E-25	-18.8239762	47.62279	-2.25088209	SRPK2	SRSF protein kinase 2
711	2.08E-22	2.62E-25	-19.214693	47.41136	-2.4606462	C1QTNF3	C1q and tumor necrosis factor related protein 3
8897	2.08E-22	2.82E-25	-18.4716626	47.3158	-2.03302089	GTSF1L	gametocyte specific factor 1 like
15188	2.15E-22	3.04E-25	-17.6531717	47.21393	-1.82691069	SPACA9	sperm acrosome associated 9
12091	2.20E-22	3.21E-25	-17.8156792	47.16148	-2.11686942	HSPB9	heat shock protein family B (small) member 9
19463	3.66E-22	5.55E-25	-18.2106241	46.64783	-1.94653731	FANCD2OS	FANCD2 opposite strand
5981	4.57E-22	7.15E-25	-17.9081024	46.38731	-1.28205162	CDC40	cell division cycle 40
11013	5.75E-22	9.30E-25	-17.2596192	46.10289	-1.62571382	DEF6	DEF6, guanine nucleotide exchange factor
18959	5.81E-22	9.71E-25	-17.4191744	46.06721	-2.25185403	PRKACG	protein kinase cAMP-activated catalytic subunit gamma
19101	6.20E-22	1.07E-24	-17.3847707	45.97142	-1.58018916	LRP2BP	LRP2 binding protein
16925	6.97E-22	1.24E-24	-17.1601381	45.81921	-2.11925484	LELP1	late cornified envelope like proline rich 1
6884	7.18E-22	1.31E-24	-17.3118694	45.76799	-2.55086134	ZNF683	zinc finger protein 683
2277	9.01E-22	1.72E-24	-17.7792282	45.52785	-1.89280529	TTC7A	tetratricopeptide repeat domain 7A
7556	9.01E-22	1.74E-24	-17.7749243	45.51657	-1.84381932	FBXL13	F-box and leucine rich repeat protein 13
13558	9.16E-22	1.87E-24	-19.7763805	45.50962	-2.32445026	PDZD8	PDZ domain containing 8
5135	9.07E-22	1.80E-24	-17.3783055	45.4646	-2.09133613	RNF133	ring finger protein 133
11423	1.09E-21	2.27E-24	-17.1182156	45.22712	-2.53124106	TSKS	testis specific serine kinase substrate
9992	1.20E-21	2.57E-24	-17.0746487	45.10178	-1.81292463	C3orf30	chromosome 3 open reading frame 30
11936	1.22E-21	2.69E-24	-17.0584209	45.05597	-1.84551853	PRSS58	protease, serine 58
5229	1.22E-21	2.73E-24	-16.8870953	45.03466	-2.51960541	FRAT1	frequently rearranged in advanced T-cell lymphomas 1
6433	1.31E-21	3.02E-24	-16.8523949	44.93433	-1.90573412	TRIM17	tripartite motif containing 17
8862	1.42E-21	3.33E-24	-16.8185297	44.83627	-2.2202971	CCIN	calicin
9307	1.46E-21	3.69E-24	-19.1593265	44.83228	-2.39128683	FGD4	FYVE, RhoGEF and PH domain containing 4
11209	1.43E-21	3.44E-24	-16.9721435	44.81372	-1.81164005	IZUMO2	IZUMO family member 2
16096	1.46E-21	3.60E-24	-17.1300786	44.77935	-1.78103177	TRIM42	tripartite motif containing 42
10170	1.46E-21	3.73E-24	-16.7797931	44.72394	-1.70252454	SPATA32	spermatogenesis associated 32
19804	1.52E-21	4.12E-24	-17.8623101	44.68376	-2.52665907	ZFAND4	zinc finger AN1-type containing 4
12588	1.52E-21	4.13E-24	-17.4503821	44.66039	-1.48150416	DIAPH3	diaphanous related formin 3
9257	1.54E-21	4.30E-24	-18.3009222	44.65774	-2.75613138	IQCF5	IQ motif containing F5
19642	2.05E-21	5.88E-24	-16.7856138	44.2822	-1.96244323	AKIRIN1	akirin 1
8695	2.11E-21	6.17E-24	-16.6082675	44.22441	-2.9590605	AKAP4	A-kinase anchoring protein 4
6355	2.28E-21	6.78E-24	-17.266438	44.1699	-2.70898648	FAM71C	family with sequence similarity 71 member C
7395	2.43E-21	7.36E-24	-17.0515071	44.07952	-1.63827306	SESN3	sestrin 3
22530	2.60E-21	8.01E-24	-18.2875804	44.01705	-2.51804312	CCDC70	coiled-coil domain containing 70
14555	3.02E-21	9.45E-24	-18.2184362	43.88975	-2.43042843	TMF1	TATA element modulatory factor 1
10223	3.51E-21	1.19E-23	-18.9212949	43.68614	-1.11018214	ZNF570	zinc finger protein 570
6532	3.32E-21	1.08E-23	-16.4197027	43.6712	-1.27902264	SDCCAG3	serologically defined colon cancer antigen 3
17656	3.37E-21	1.13E-23	-16.7254579	43.64798	-2.44935356	GID4	GID complex subunit 4 homolog
8618	3.35E-21	1.10E-23	-16.4116137	43.64737	-2.40977779	TPPP2	tubulin polymerization promoting protein family member 2
4376	3.66E-21	1.26E-23	-17.4283614	43.57634	-3.10915233	FAM81B	family with sequence similarity 81 member B
2260	3.74E-21	1.35E-23	-17.2035098	43.49357	-2.16091851	C6orf10	chromosome 6 open reading frame 10
11736	3.69E-21	1.29E-23	-16.3579983	43.48924	-2.26498282	IQCF1	IQ motif containing F1
22340	3.74E-21	1.33E-23	-16.8389219	43.48866	-1.20004887	SIRPD	signal regulatory protein delta
8216	4.47E-21	1.63E-23	-16.2790906	43.25588	-2.3464117	ACTL7A	actin like 7A
18013	5.11E-21	1.92E-23	-16.225066	43.09567	-1.76251436	KLHL10	kelch like family member 10
20060	5.23E-21	1.99E-23	-16.694113	43.0919	-1.6924939	C16orf78	chromosome 16 open reading frame 78
11692	5.66E-21	2.19E-23	-17.4238451	43.0422	-1.9073852	COIL	coilin
6807	6.35E-21	2.49E-23	-18.0602063	42.94353	-3.06519897	TBC1D21	TBC1 domain family member 21
12208	6.50E-21	2.68E-23	-16.763359	42.80388	-1.97905966	KLHL11	kelch like family member 11
5833	6.48E-21	2.61E-23	-16.2740507	42.80334	-2.59714274	CCDC185	coiled-coil domain containing 185
2529	6.48E-21	2.58E-23	-16.125718	42.80014	-1.60745157	HSPA1L	heat shock protein family A (Hsp70) member 1 like
4566	6.50E-21	2.67E-23	-16.1154536	42.76954	-1.15828276	FAM104A	family with sequence similarity 104 member A
17648	7.17E-21	3.12E-23	-18.2192161	42.72975	-2.20230158	FAM76B	family with sequence similarity 76 member B
10788	6.67E-21	2.79E-23	-16.10066	42.72541	-1.1163588	INPP1	inositol polyphosphate-1-phosphatase
18868	7.17E-21	3.17E-23	-17.0765021	42.6632	-2.14547139	CCDC83	coiled-coil domain containing 83
5669	7.17E-21	3.04E-23	-16.0718433	42.63937	-2.25607736	FBXO24	F-box protein 24
3879	7.17E-21	3.10E-23	-16.2145465	42.62929	-2.47892446	PROCA1	protein interacting with cyclin A1
2674	7.25E-21	3.29E-23	-16.6887549	42.59996	-1.94898682	CFAP52	cilia and flagella associated protein 52
11764	7.17E-21	3.18E-23	-16.0562366	42.59274	-1.70928854	DYNLL2	dynein light chain LC8-type 2
14043	7.25E-21	3.28E-23	-16.046488	42.56359	-2.76612363	SPATA6	spermatogenesis associated 6
9063	8.51E-21	3.91E-23	-15.9880862	42.38873	-1.80571888	CCDC96	coiled-coil domain containing 96
4552	9.82E-21	4.61E-23	-16.5670858	42.26988	-1.50222527	PEX13	peroxisomal biogenesis factor 13
16946	1.02E-20	4.86E-23	-16.0632033	42.18467	-2.33851867	FAM71A	family with sequence similarity 71 member A
3860	1.07E-20	5.16E-23	-16.7048212	42.17045	-2.28082537	AQP5	aquaporin 5
10989	1.08E-20	5.24E-23	-15.8911239	42.0975	-1.08573036	ZNF516	zinc finger protein 516
9981	1.13E-20	5.54E-23	-16.3323929	42.0771	-1.32368051	ACTRT2	actin related protein T2
2511	1.16E-20	5.78E-23	-15.8588907	42.00043	-1.4462107	RSPH3	radial spoke 3 homolog
6549	1.19E-20	5.95E-23	-15.8490534	41.97078	-2.90276381	TSSK2	testis specific serine kinase 2
10221	1.23E-20	6.23E-23	-16.1317176	41.95064	-1.41172881	CARNMT1	carnosine N-methyltransferase 1
19479	1.33E-20	6.80E-23	-15.8050311	41.83794	-1.91967807	TLE4	transducin like enhancer of split 4
7716	1.49E-20	7.72E-23	-15.7634479	41.71225	-1.45395309	MROH7	maestro heat like repeat family member 7
10608	1.64E-20	8.63E-23	-16.3429524	41.64893	-2.03004423	SPAG9	sperm associated antigen 9
7039	1.64E-20	8.57E-23	-15.8723698	41.62006	-2.99671298	SPATA19	spermatogenesis associated 19
11639	1.81E-20	9.67E-23	-15.831869	41.49966	-1.97367239	ZC2HC1C	zinc finger C2HC-type containing 1C
13325	1.85E-20	1.00E-22	-16.2892806	41.49936	-1.50258344	LEXM	lymphocyte expansion molecule
15546	1.81E-20	9.74E-23	-15.6868507	41.48015	-1.16468773	NCBP2	nuclear cap binding protein subunit 2
15110	1.93E-20	1.06E-22	-15.6601975	41.39922	-1.71171143	ACTL9	actin like 9
8716	2.01E-20	1.13E-22	-16.4185423	41.39172	-1.27058334	HARBI1	harbinger transposase derived 1
4930	1.99E-20	1.10E-22	-15.7888078	41.37142	-2.9728736	FAM71F1	family with sequence similarity 71 member F1
17241	2.16E-20	1.23E-22	-17.3951535	41.36379	-2.33162209	PRSS54	protease, serine 54
7400	2.24E-20	1.30E-22	-16.5489664	41.26802	-2.23331998	ZSCAN29	zinc finger and SCAN domain containing 29
16070	2.16E-20	1.24E-22	-15.6076905	41.23953	-2.39921509	TMCO5A	transmembrane and coiled-coil domains 5A
19917	2.32E-20	1.36E-22	-15.5779971	41.14907	-1.98135144	DDX20	DEAD-box helicase 20
7320	2.39E-20	1.43E-22	-15.8490893	41.1282	-1.37094618	PRM3	protamine 3
16462	2.39E-20	1.42E-22	-15.7035042	41.11672	-1.92580147	HOOK1	hook microtubule tethering protein 1
10807	2.61E-20	1.57E-22	-15.670452	41.01779	-2.04274675	SMCP	sperm mitochondria associated cysteine rich protein
18501	2.80E-20	1.70E-22	-15.7896543	40.95089	-2.40827779	LSM14B	LSM family member 14B
7409	2.86E-20	1.77E-22	-16.0875959	40.93424	-1.38411044	TRAPPC6B	trafficking protein particle complex 6B
11306	3.11E-20	2.03E-22	-17.9316167	40.90056	-1.85493624	THAP2	THAP domain containing 2
17587	2.86E-20	1.78E-22	-15.6288981	40.89322	-1.40034823	WDR1	WD repeat domain 1
18041	2.86E-20	1.78E-22	-15.4905161	40.88192	-1.679725	EPB41L3	erythrocyte membrane protein band 4.1 like 3
16440	2.90E-20	1.85E-22	-15.7614414	40.86794	-1.91846058	RBL2	RB transcriptional corepressor like 2
15295	2.90E-20	1.84E-22	-15.6181748	40.86104	-3.06172643	C12orf54	chromosome 12 open reading frame 54
22291	3.03E-20	1.95E-22	-16.5835036	40.85911	-1.38760308	ANKAR	ankyrin and armadillo repeat containing
12839	2.90E-20	1.85E-22	-15.6166915	40.85659	-2.70630981	TIMD4	T-cell immunoglobulin and mucin domain containing 4
3382	3.03E-20	1.96E-22	-16.0521346	40.83438	-1.37685691	MFSD4B	major facilitator superfamily domain containing 4B
19356	3.16E-20	2.11E-22	-16.956373	40.81265	-1.86810864	SETD9	SET domain containing 9
13484	3.12E-20	2.06E-22	-15.442838	40.73592	-1.27090674	TYSND1	trypsin domain containing 1
7776	3.18E-20	2.14E-22	-15.4299241	40.69633	-1.48702799	KLF11	Kruppel like factor 11
6915	3.29E-20	2.23E-22	-15.5534546	40.66652	-1.85680119	SAMD4A	sterile alpha motif domain containing 4A
4533	3.72E-20	2.55E-22	-16.1256851	40.58644	-1.30659869	STAM2	signal transducing adaptor molecule 2
510	4.00E-20	2.86E-22	-18.3467384	40.56418	-1.17644807	ARMC2	armadillo repeat containing 2
9929	4.05E-20	2.98E-22	-18.3278059	40.53973	-2.90133154	SAXO1	stabilizer of axonemal microtubules 1
17173	3.79E-20	2.61E-22	-15.7940528	40.53787	-1.5051672	CARTPT	CART prepropeptide
11235	3.88E-20	2.69E-22	-15.4915328	40.47992	-1.77553653	PPP1R13B	protein phosphatase 1 regulatory subunit 13B
12273	4.04E-20	2.91E-22	-16.2505431	40.4646	-1.5897831	FSCN3	fascin actin-bundling protein 3
13384	3.88E-20	2.73E-22	-15.351897	40.45665	-1.4444145	MAPKAPK2	mitogen-activated protein kinase-activated protein kinase 2
15476	3.88E-20	2.74E-22	-15.350554	40.45252	-1.61308243	CLPB	ClpB homolog, mitochondrial AAA ATPase chaperonin
19830	4.00E-20	2.86E-22	-15.6144879	40.4381	-1.48153469	CEP70	centrosomal protein 70
17959	4.04E-20	2.93E-22	-15.6059836	40.40908	-2.05365059	LPGAT1	lysophosphatidylglycerol acyltransferase 1
4949	4.18E-20	3.14E-22	-16.5966314	40.38024	-2.02253135	ACTL10	actin like 10
8527	4.04E-20	2.95E-22	-15.3261986	40.37755	-1.59339403	WDR53	WD repeat domain 53
17922	4.18E-20	3.14E-22	-15.5829676	40.3409	-3.05230281	SPACA3	sperm acrosome associated 3
18098	4.55E-20	3.44E-22	-15.2764318	40.22412	-1.48390963	CCNY	cyclin Y
988	4.81E-20	3.70E-22	-15.8291042	40.20283	-1.89761875	ERO1B	endoplasmic reticulum oxidoreductase 1 beta
4606	4.71E-20	3.59E-22	-15.3973544	40.19519	-2.52015439	EIF5A2	eukaryotic translation initiation factor 5A2
16573	4.81E-20	3.73E-22	-15.6724504	40.18531	-2.39868985	MNS1	meiosis specific nuclear structural 1
12323	4.81E-20	3.74E-22	-15.3834971	40.15321	-2.56971928	CCDC54	coiled-coil domain containing 54
4536	5.24E-20	4.19E-22	-16.8977152	40.15151	-2.59924444	PGK2	phosphoglycerate kinase 2
845	5.06E-20	4.02E-22	-15.9628613	40.13433	-1.48903168	ATP23	ATP23 metallopeptidase and ATP synthase assembly factor homolog
11475	4.99E-20	3.93E-22	-15.3670181	40.10324	-1.88065734	EFCAB11	EF-hand calcium binding domain 11
10504	5.34E-20	4.29E-22	-15.4780393	40.03361	-1.81833246	SPACA5	sperm acrosome associated 5
7889	5.76E-20	4.67E-22	-16.0786486	39.9971	-1.47657428	CAPSL	calcyphosine like
16313	5.79E-20	4.71E-22	-15.1752673	39.91127	-2.75316373	CRISP2	cysteine rich secretory protein 2
10777	5.88E-20	4.85E-22	-15.2985126	39.89518	-3.2591087	HMGB4	high mobility group box 4
21129	5.94E-20	4.94E-22	-15.2927208	39.88288	-1.52814021	DUSP13	dual specificity phosphatase 13
19178	5.88E-20	4.85E-22	-15.1658781	39.88217	-1.28503956	PARD6A	par-6 family cell polarity regulator alpha
20769	6.16E-20	5.18E-22	-15.5602529	39.85842	-1.75478898	RFPL3	ret finger protein like 3
4544	6.26E-20	5.33E-22	-15.550265	39.82925	-1.76420818	CAMK4	calcium/calmodulin dependent protein kinase IV
16753	6.28E-20	5.38E-22	-15.1330622	39.78037	-1.87267136	TSSK1B	testis specific serine kinase 1B
11675	6.89E-20	6.01E-22	-15.9867707	39.74579	-2.4242865	TSACC	TSSK6 activating cochaperone
15276	7.16E-20	6.36E-22	-16.730552	39.73809	-1.62103088	TLE3	transducin like enhancer of split 3
1226	6.86E-20	5.91E-22	-15.6662988	39.73801	-1.80177384	MBD3L1	methyl-CpG binding domain protein 3 like 1
15523	6.89E-20	5.99E-22	-15.0981891	39.67204	-1.70981752	ASGR1	asialoglycoprotein receptor 1
1882	6.94E-20	6.09E-22	-15.0930635	39.65611	-1.78494624	RNF141	ring finger protein 141
16698	7.48E-20	6.83E-22	-16.3000868	39.64236	-1.34558215	TTC39B	tetratricopeptide repeat domain 39B
14119	7.11E-20	6.27E-22	-15.0836828	39.62694	-1.90317897	FAM92A1	family with sequence similarity 92 member A1
19974	7.33E-20	6.58E-22	-15.1985468	39.59051	-1.52258793	PSMG1	proteasome assembly chaperone 1
19812	7.33E-20	6.59E-22	-15.1982736	39.58968	-2.00973258	GPR135	G protein-coupled receptor 135
4500	7.48E-20	6.88E-22	-15.4638308	39.57625	-1.24066826	ATF2	activating transcription factor 2
19847	7.33E-20	6.63E-22	-15.0661491	39.57238	-1.88802182	HIP1	huntingtin interacting protein 1
3350	8.30E-20	7.93E-22	-17.595452	39.56465	-2.52516516	TTC23L	tetratricopeptide repeat domain 23 like
11421	7.48E-20	6.83E-22	-15.1866577	39.55419	-1.6148231	OAZ3	ornithine decarboxylase antizyme 3
6257	7.82E-20	7.26E-22	-15.7528513	39.54651	-2.04160019	DNAI2	dynein axonemal intermediate chain 2
668	8.11E-20	7.63E-22	-15.7354008	39.49773	-2.42881208	TCTE3	t-complex-associated-testis-expressed 3
21060	8.21E-20	7.80E-22	-15.892313	39.48572	-2.10800935	WDR78	WD repeat domain 78
13083	7.82E-20	7.30E-22	-15.0352	39.47599	-1.53578156	UTRN	utrophin
3019	8.44E-20	8.11E-22	-15.2659916	39.40041	-1.52859353	UBE2J1	ubiquitin conjugating enzyme E2 J1
13889	8.59E-20	8.29E-22	-14.9943482	39.34856	-1.80897371	DNALI1	dynein axonemal light intermediate chain 1
14727	9.54E-20	9.27E-22	-14.959076	39.23837	-2.32839168	DNAJB8	DnaJ heat shock protein family (Hsp40) member B8
19073	1.05E-19	1.03E-21	-15.1856729	39.15352	-1.27474303	ZNF821	zinc finger protein 821
15864	1.11E-19	1.10E-21	-15.0320189	39.08019	-1.33540975	BPIFA3	BPI fold containing family A member 3
4207	1.12E-19	1.11E-21	-14.9024328	39.06109	-2.00290282	ACTRT3	actin related protein T3
6708	1.16E-19	1.15E-21	-15.0166306	39.03286	-1.39357364	MFF	mitochondrial fission factor
12704	1.19E-19	1.19E-21	-15.0059974	39.00013	-2.12781853	LRWD1	leucine rich repeats and WD repeat domain containing 1
10249	1.50E-19	1.52E-21	-14.8010443	38.74274	-2.77504332	RIMBP3	RIMS binding protein 3
16944	1.56E-19	1.60E-21	-15.1796987	38.73263	-1.89115356	EFCAB6	EF-hand calcium binding domain 6
21030	1.53E-19	1.56E-21	-14.9190245	38.73193	-2.01938163	SPACA1	sperm acrosome associated 1
18563	1.74E-19	1.86E-21	-17.2197685	38.72468	-2.92345331	LYZL4	lysozyme like 4
17144	1.60E-19	1.64E-21	-15.1704975	38.70528	-2.91880763	LINC00467	long intergenic non-protein coding RNA 467
4622	1.60E-19	1.65E-21	-14.7754168	38.66207	-2.06655347	ACTL7B	actin like 7B
3049	1.67E-19	1.75E-21	-14.8813579	38.61547	-1.40789447	OSER1	oxidative stress responsive serine rich 1
17940	1.79E-19	1.94E-21	-15.9083252	38.60792	-2.04450241	TGIF2LY	TGFB induced factor homeobox 2 like, Y-linked
19690	1.71E-19	1.80E-21	-15.0024587	38.59931	-2.94924262	KIF2B	kinesin family member 2B
3718	1.74E-19	1.86E-21	-15.1288308	38.58695	-1.31891862	SCOC	short coiled-coil protein
3261	1.80E-19	1.95E-21	-15.5638459	38.57599	-2.52603077	PFN4	profilin family member 4
6852	1.74E-19	1.85E-21	-14.8637331	38.56092	-2.41003145	UBQLN3	ubiquilin 3
15387	1.81E-19	1.97E-21	-15.2521835	38.54109	-1.28941421	MORN3	MORN repeat containing 3
20197	1.77E-19	1.91E-21	-14.8544556	38.53219	-2.52194542	12-Sep	septin 12
7202	2.27E-19	2.52E-21	-15.9939763	38.3608	-1.80016613	PXDNL	peroxidasin like
20132	2.12E-19	2.34E-21	-15.0524304	38.35937	-1.2304464	ETNK1	ethanolamine kinase 1
18585	2.12E-19	2.32E-21	-14.9202623	38.35594	-1.75244263	FAM187B	family with sequence similarity 187 member B
21702	2.39E-19	2.67E-21	-15.6163757	38.27762	-1.81920741	LRRC6	leucine rich repeat containing 6
16409	2.62E-19	2.97E-21	-16.7712978	38.24845	-2.64350617	ZDHHC20	zinc finger DHHC-type containing 20
4192	2.39E-19	2.69E-21	-15.1470074	38.23373	-2.03322779	PDE1A	phosphodiesterase 1A
1724	2.60E-19	2.93E-21	-15.1177209	38.14238	-1.6591076	LRRC71	leucine rich repeat containing 71
4980	2.71E-19	3.10E-21	-15.0986018	38.09181	-2.28117147	CALR3	calreticulin 3
17336	2.65E-19	3.02E-21	-14.7068814	38.07369	-1.58265667	OPLAH	5-oxoprolinase (ATP-hydrolysing)
17123	2.83E-19	3.26E-21	-14.6829608	37.99911	-1.02462661	SEC14L1	SEC14 like lipid binding 1
12541	2.89E-19	3.33E-21	-14.6756375	37.97626	-1.86249625	MORN5	MORN repeat containing 5
13065	3.03E-19	3.51E-21	-14.6586378	37.93104	-1.82226479	H2AFJ	H2A histone family member J
2651	3.26E-19	3.82E-21	-15.0281497	37.88472	-1.90727638	ACSL6	acyl-CoA synthetase long-chain family member 6
22488	3.48E-19	4.14E-21	-15.6274058	37.85166	-1.12583842	HERPUD2	HERPUD family member 2
17522	3.32E-19	3.90E-21	-14.6254763	37.81959	-1.35634144	LATS2	large tumor suppressor kinase 2
21549	3.51E-19	4.19E-21	-15.2932486	37.81724	-2.06127839	ERICH6	glutamate rich 6
12009	3.53E-19	4.24E-21	-15.2896837	37.80612	-1.35759194	MAPRE3	microtubule associated protein RP/EB family member 3
361	3.48E-19	4.15E-21	-14.8623029	37.78983	-1.3595958	MED21	mediator complex subunit 21
540	3.88E-19	4.68E-21	-14.5671482	37.637	-1.86540857	PPM1J	protein phosphatase, Mg2+/Mn2+ dependent 1J
9742	3.93E-19	4.76E-21	-14.6862592	37.63287	-2.23528334	SOX30	SRY-box 30
11748	3.97E-19	4.83E-21	-14.4381926	37.59265	-1.85644964	HIST1H2AL	histone cluster 1, H2al
1298	4.12E-19	5.09E-21	-14.9310431	37.59202	-1.52953679	RRP1B	ribosomal RNA processing 1B
7022	4.12E-19	5.09E-21	-14.794749	37.58637	-1.10638316	NUP35	nucleoporin 35
13146	4.12E-19	5.11E-21	-14.7932304	37.58179	-1.00987949	NR2C2	nuclear receptor subfamily 2 group C member 2
8131	4.29E-19	5.40E-21	-14.6455941	37.51538	-1.00589392	RTF1	RTF1 homolog, Paf1/RNA polymerase II complex component
4435	4.19E-19	5.23E-21	-14.4136184	37.51414	-1.66523693	HIST1H2AJ	histone cluster 1, H2aj
13580	4.23E-19	5.30E-21	-14.5277603	37.51345	-1.37719647	FNDC11	fibronectin type III domain containing 11
21490	4.41E-19	5.57E-21	-14.7649237	37.49636	-1.66160697	TEKT2	tektin 2
7370	5.08E-19	6.61E-21	-15.6298634	37.40286	-2.24144314	CASC1	cancer susceptibility candidate 1
2164	4.78E-19	6.17E-21	-14.8664792	37.40065	-1.99360796	SLC25A33	solute carrier family 25 member 33
9909	4.65E-19	5.92E-21	-14.3748723	37.39021	-2.53725055	TCP10L	t-complex 10-like
15281	5.37E-19	7.07E-21	-16.4079145	37.38868	-1.92739056	LRTOMT	leucine rich transmembrane and O-methyltransferase domain containing
14768	4.65E-19	5.95E-21	-14.3737114	37.3865	-1.55042912	LRRC37B	leucine rich repeat containing 37B
21485	5.78E-19	7.72E-21	-17.6986931	37.35008	-2.59352895	DDI1	DNA damage inducible 1 homolog 1
12463	5.08E-19	6.59E-21	-14.5814173	37.30962	-2.47290658	ZNF165	zinc finger protein 165
11113	5.43E-19	7.17E-21	-14.9569825	37.27011	-1.44613849	GK	glycerol kinase
18321	5.18E-19	6.76E-21	-14.3340132	37.25931	-1.75697956	TBL2	transducin (beta)-like 2
12955	5.22E-19	6.83E-21	-14.330379	37.24766	-2.63887473	ADAD1	adenosine deaminase domain containing 1
13532	6.43E-19	8.79E-21	-15.7049123	37.13273	-1.63762105	PPP1R32	protein phosphatase 1 regulatory subunit 32
2290	5.87E-19	7.88E-21	-14.2862828	37.10612	-1.4365407	ST6GALNAC2	ST6 N-acetylgalactosaminide alpha-2,6-sialyltransferase 2
16555	5.89E-19	7.93E-21	-14.2842677	37.09965	-1.66054594	G2E3	G2/M-phase specific E3 ubiquitin protein ligase
4357	6.16E-19	8.37E-21	-14.6313676	37.09191	-1.98520795	EAF1	ELL associated factor 1
8051	6.06E-19	8.20E-21	-14.2739896	37.06662	-2.52985182	MYCBPAP	MYCBP associated protein
16114	7.20E-19	1.00E-20	-15.4755175	36.99208	-2.82816282	NME5	NME/NM23 family member 5
13876	6.52E-19	8.95E-21	-14.3620049	36.99134	-1.1772881	PHKG2	phosphorylase kinase catalytic subunit gamma 2
20392	6.56E-19	9.04E-21	-14.2437525	36.96938	-1.33268822	HIST1H3C	histone cluster 1, H3c
18163	7.00E-19	9.69E-21	-14.4573281	36.92522	-1.98910805	KNSTRN	kinetochore localized astrin/SPAG5 binding protein
9737	7.75E-19	1.10E-20	-15.2710699	36.88658	-2.45234093	FAM217A	family with sequence similarity 217 member A
12576	7.38E-19	1.03E-20	-14.3180905	36.85243	-1.62100329	YBX2	Y-box binding protein 2
15823	7.45E-19	1.05E-20	-14.1983959	36.82329	-1.35704812	C7orf34	chromosome 7 open reading frame 34
3604	7.61E-19	1.07E-20	-14.3051409	36.81142	-1.68035171	PSORS1C1	psoriasis susceptibility 1 candidate 1
15417	8.78E-19	1.26E-20	-14.1409763	36.63796	-1.04580801	PSMA6	proteasome subunit alpha 6
11085	1.03E-18	1.53E-20	-15.8804371	36.61288	-1.16528592	DNAJC24	DnaJ heat shock protein family (Hsp40) member C24
13679	9.18E-19	1.33E-20	-14.1248109	36.58571	-1.30141608	SH3GLB1	SH3 domain containing GRB2 like endophilin B1
17564	9.53E-19	1.38E-20	-14.1120846	36.54455	-1.13338974	SLC6A16	solute carrier family 6 member 16
14241	9.97E-19	1.45E-20	-14.0973074	36.49673	-1.3025195	ATPIF1	ATPase inhibitory factor 1
12415	1.03E-18	1.51E-20	-14.08451	36.45529	-1.88665984	LYPD4	LY6/PLAUR domain containing 4
3174	1.03E-18	1.52E-20	-14.083398	36.45169	-1.05282055	CCDC86	coiled-coil domain containing 86
18969	1.03E-18	1.53E-20	-14.0814892	36.44551	-2.36387119	YPEL1	yippee like 1
2549	1.32E-18	1.99E-20	-15.3946406	36.32063	-1.80774139	TMIGD3	transmembrane and immunoglobulin domain containing 3
3007	1.32E-18	2.00E-20	-14.8987017	36.27822	-2.50725299	C9orf24	chromosome 9 open reading frame 24
3277	1.32E-18	1.97E-20	-14.1142939	36.21442	-1.23150534	ARHGEF7	Rho guanine nucleotide exchange factor 7
20401	1.32E-18	1.97E-20	-14.0038942	36.19379	-1.87735561	LRRC46	leucine rich repeat containing 46
21808	1.43E-18	2.18E-20	-14.7199655	36.18407	-1.59702165	AKR1E2	aldo-keto reductase family 1 member E2
20985	1.38E-18	2.09E-20	-14.3326335	36.17026	-1.24536688	MRPS15	mitochondrial ribosomal protein S15
18565	1.42E-18	2.16E-20	-14.3220146	36.14634	-1.18162677	ASAP1	ArfGAP with SH3 domain, ankyrin repeat and PH domain 1
9947	1.46E-18	2.25E-20	-14.1886698	36.08621	-2.55612303	MFSD6L	major facilitator superfamily domain containing 6 like
8467	1.43E-18	2.19E-20	-13.9705548	36.08539	-1.33118213	PDZD9	PDZ domain containing 9
10471	1.46E-18	2.24E-20	-13.9647763	36.06659	-1.76821686	LPP	LIM domain containing preferred translocation partner in lipoma
6889	1.54E-18	2.38E-20	-14.290673	36.04096	-3.36215628	CEP170	centrosomal protein 170
7784	1.54E-18	2.39E-20	-14.1693355	36.03501	-1.57371219	EFCAB2	EF-hand calcium binding domain 2
2737	1.57E-18	2.44E-20	-13.9381845	35.98001	-2.4903681	ACRBP	acrosin binding protein
12084	1.63E-18	2.54E-20	-13.9255573	35.93887	-2.57855754	TTC25	tetratricopeptide repeat domain 25
6107	1.66E-18	2.61E-20	-14.0272959	35.92627	-1.42596368	UBL3	ubiquitin like 3
16231	1.76E-18	2.78E-20	-14.3659711	35.90779	-1.56821163	NEDD1	neural precursor cell expressed, developmentally down-regulated 1
18076	1.88E-18	2.99E-20	-15.0715965	35.90359	-3.34609094	IZUMO4	IZUMO family member 4
4741	1.73E-18	2.72E-20	-14.1283301	35.8965	-1.74664429	BOD1L2	biorientation of chromosomes in cell division 1 like 2
4168	1.76E-18	2.78E-20	-13.898123	35.8494	-2.18202552	IQCD	IQ motif containing D
4965	1.88E-18	3.00E-20	-14.0969679	35.7977	-2.34631058	ZPBP	zona pellucida binding protein
1352	1.88E-18	2.98E-20	-13.985781	35.79315	-1.7087513	ABHD1	abhydrolase domain containing 1
1238	1.98E-18	3.17E-20	-14.1986526	35.76586	-2.05096124	WDR63	WD repeat domain 63
9037	2.03E-18	3.28E-20	-14.3126522	35.7536	-2.01274077	DNAJC18	DnaJ heat shock protein family (Hsp40) member C18
16564	2.06E-18	3.34E-20	-14.4372432	35.741	-1.6940595	CCT8L2	chaperonin containing TCP1 subunit 8 like 2
9709	2.15E-18	3.50E-20	-14.5578821	35.70578	-1.70003667	CIB4	calcium and integrin binding family member 4
10294	2.01E-18	3.23E-20	-13.8522489	35.69958	-1.09829545	PTPN21	protein tyrosine phosphatase, non-receptor type 21
14363	2.15E-18	3.52E-20	-14.1653644	35.66285	-1.16530912	CCDC113	coiled-coil domain containing 113
19630	2.18E-18	3.57E-20	-14.2839982	35.65044	-2.22499245	C16orf95	chromosome 16 open reading frame 95
7625	2.14E-18	3.48E-20	-13.9378701	35.63925	-1.94681561	PIAS2	protein inhibitor of activated STAT 2
7250	2.53E-18	4.28E-20	-15.4726065	35.58803	-1.23251573	CCDC183	coiled-coil domain containing 183
11356	2.32E-18	3.81E-20	-13.8016994	35.53418	-1.36114147	DPCD	deleted in primary ciliary dyskinesia homolog (mouse)
7992	2.46E-18	4.06E-20	-13.88938	35.48319	-1.11426543	HABP4	hyaluronan binding protein 4
14902	2.46E-18	4.08E-20	-13.8882877	35.47967	-1.67138629	FBXO25	F-box protein 25
15623	2.45E-18	4.04E-20	-13.783779	35.47546	-2.90408341	ROPN1L	rhophilin associated tail protein 1 like
14687	2.53E-18	4.28E-20	-14.1024097	35.46765	-1.42077888	ZNF596	zinc finger protein 596
9425	2.48E-18	4.13E-20	-13.7774218	35.45462	-1.1688028	MDM4	MDM4, p53 regulator
3730	2.53E-18	4.25E-20	-13.8752283	35.43758	-2.84507871	CABYR	calcium binding tyrosine phosphorylation regulated
12437	2.53E-18	4.24E-20	-13.7695459	35.4288	-1.12255385	AMOTL1	angiomotin like 1
4382	2.67E-18	4.55E-20	-13.9658533	35.39361	-2.34497784	SLC22A16	solute carrier family 22 member 16
2090	2.74E-18	4.69E-20	-13.9564059	35.35336	-1.43932472	AGPS	alkylglycerone phosphate synthase
22205	2.90E-18	5.00E-20	-14.3018991	35.34448	-1.74160216	IL4I1	interleukin 4 induced 1
15286	2.82E-18	4.85E-20	-14.0619951	35.34207	-1.05282062	PAPOLA	poly(A) polymerase alpha
16751	2.74E-18	4.71E-20	-13.7371948	35.32263	-1.26079359	PAOX	polyamine oxidase (exo-N4-amino)
20720	3.08E-18	5.38E-20	-14.5527061	35.29189	-3.10842166	TXNDC2	thioredoxin domain containing 2
1876	2.96E-18	5.16E-20	-13.8156895	35.24543	-1.85548133	FLJ35934	FLJ35934
5644	2.95E-18	5.12E-20	-13.7124027	35.24118	-1.37366583	PAFAH1B1	platelet activating factor acetylhydrolase 1b regulatory subunit 1
15473	2.95E-18	5.14E-20	-13.7111185	35.23696	-1.2513119	LOC84214	uncharacterized LOC84214
13027	3.24E-18	5.70E-20	-13.679603	35.1333	-1.4719563	ITCH	itchy E3 ubiquitin protein ligase
12403	3.34E-18	5.89E-20	-13.6699012	35.10136	-1.40430417	SH3GL3	SH3 domain containing GRB2 like 3, endophilin A3
1325	3.83E-18	6.88E-20	-14.0702568	35.0069	-1.98041873	HCFC2	host cell factor C2
13676	3.67E-18	6.52E-20	-13.6388327	34.999	-1.94781708	C20orf85	chromosome 20 open reading frame 85
9152	3.73E-18	6.66E-20	-13.632491	34.97809	-1.14672436	HIST1H2AB	histone cluster 1, H2ab
19077	3.77E-18	6.76E-20	-13.6282072	34.96397	-1.45620604	TUBA4A	tubulin alpha 4a
15058	3.95E-18	7.12E-20	-13.939423	34.95991	-2.68029768	CCDC136	coiled-coil domain containing 136
18832	4.91E-18	9.15E-20	-16.0187883	34.89272	-1.8522544	SENP2	SUMO1/sentrin/SMT3 specific peptidase 2
16948	4.02E-18	7.27E-20	-13.6060837	34.89097	-1.54815097	TCFL5	transcription factor like 5
21934	4.59E-18	8.41E-20	-15.0291353	34.88323	-1.54135784	GLT1D1	glycosyltransferase 1 domain containing 1
11804	4.88E-18	9.08E-20	-15.0000681	34.82725	-3.18774305	CCDC7	coiled-coil domain containing 7
4967	4.39E-18	7.97E-20	-13.578341	34.79934	-1.95025643	APH1B	aph-1 homolog B, gamma-secretase subunit
5438	4.53E-18	8.25E-20	-13.6711728	34.7771	-1.33623653	KLHL12	kelch like family member 12
14079	5.52E-18	1.06E-19	-15.7260213	34.73118	-2.11621711	NEK10	NIMA related kinase 10
15753	4.71E-18	8.65E-20	-13.5535756	34.71747	-1.73131797	PTTG2	pituitary tumor-transforming 2
11146	4.76E-18	8.77E-20	-13.5495039	34.704	-1.55646396	TSN	translin
317	4.93E-18	9.24E-20	-13.7441377	34.68861	-2.18809507	ARL4A	ADP ribosylation factor like GTPase 4A
9177	5.30E-18	1.02E-19	-14.6285266	34.68678	-1.68403193	SPATS1	spermatogenesis associated serine rich 1
13388	4.87E-18	9.03E-20	-13.5407077	34.67489	-1.72522483	RFX2	regulatory factor X2
19252	4.93E-18	9.22E-20	-13.6372262	34.6667	-1.4328659	TEX33	testis expressed 33
18603	5.10E-18	9.66E-20	-13.8425567	34.65652	-1.64161357	C1orf87	chromosome 1 open reading frame 87
10047	5.53E-18	1.07E-19	-14.7702682	34.65157	-1.08199823	MIPOL1	mirror-image polydactyly 1
11633	4.97E-18	9.34E-20	-13.5304286	34.64087	-1.60573828	HN1	hematological and neurological expressed 1
16312	5.02E-18	9.47E-20	-13.5263675	34.62742	-1.08684406	HIST1H3G	histone cluster 1, H3g
17000	5.08E-18	9.60E-20	-13.5222417	34.61376	-1.87091152	TBPL1	TATA-box binding protein like 1
4545	5.21E-18	9.90E-20	-13.5128894	34.58278	-2.39113173	DRC1	dynein regulatory complex subunit 1
20572	5.30E-18	1.02E-19	-13.7142666	34.58191	-1.31172823	USP25	ubiquitin specific peptidase 25
3340	5.59E-18	1.09E-19	-13.8052702	34.53942	-1.30461295	FUT11	fucosyltransferase 11
33	5.61E-18	1.09E-19	-13.9205243	34.53635	-1.39858189	HIST1H2AH	histone cluster 1, H2ah
2959	5.52E-18	1.06E-19	-13.4910772	34.51048	-1.25084127	SMPD2	sphingomyelin phosphodiesterase 2
21788	6.14E-18	1.20E-19	-13.8898794	34.46121	-1.51453149	ATL3	atlastin GTPase 3
17493	5.93E-18	1.16E-19	-13.5676201	34.43986	-1.34434896	C3orf22	chromosome 3 open reading frame 22
3073	6.43E-18	1.26E-19	-13.8742473	34.40355	-1.28106225	RANGAP1	Ran GTPase activating protein 1
14550	6.46E-18	1.27E-19	-13.4376874	34.33326	-1.01295941	PROSER1	proline and serine rich 1
4425	7.00E-18	1.40E-19	-13.7259496	34.28969	-1.13876118	SFT2D2	SFT2 domain containing 2
15346	6.95E-18	1.38E-19	-13.6196896	34.27852	-1.43404081	SDE2	SDE2 telomere maintenance homolog
15732	6.85E-18	1.35E-19	-13.4191975	34.2718	-1.74372342	LZTFL1	leucine zipper transcription factor like 1
14466	6.95E-18	1.38E-19	-13.5132168	34.26212	-1.63308882	KDM4D	lysine demethylase 4D
18871	7.04E-18	1.41E-19	-13.507631	34.24385	-1.22899323	NGLY1	N-glycanase 1
3011	7.71E-18	1.55E-19	-13.6936367	34.17661	-1.50930203	RNF114	ring finger protein 114
3813	7.89E-18	1.59E-19	13.371291	34.11235	1.03803136	SHC1	SHC adaptor protein 1
578	8.02E-18	1.62E-19	13.464711	34.10332	1.09537206	HEXB	hexosaminidase subunit beta
18617	7.95E-18	1.60E-19	-13.3681855	34.102	-1.40541534	NUP155	nucleoporin 155
21034	8.16E-18	1.65E-19	-13.5633936	34.09738	-1.83476258	FSCB	fibrous sheath CABYR binding protein
13416	8.64E-18	1.77E-19	-14.0107935	34.09159	-1.18502482	FRMPD1	FERM and PDZ domain containing 1
12115	8.61E-18	1.76E-19	-13.8867368	34.08392	-1.50293128	SPESP1	sperm equatorial segment protein 1
2678	9.55E-18	2.00E-19	-15.0614005	34.07631	-1.77912143	DNAJB4	DnaJ heat shock protein family (Hsp40) member B4
1560	8.22E-18	1.67E-19	-13.4557248	34.07387	-1.62194236	OSCP1	organic solute carrier partner 1
16238	9.22E-18	1.92E-19	-14.5567903	34.07003	-2.06384753	C12orf60	chromosome 12 open reading frame 60
1869	9.00E-18	1.85E-19	-14.1281575	34.06108	-3.20465298	STON1-GTF2A1L	STON1-GTF2A1L readthrough
14359	8.31E-18	1.69E-19	-13.3519259	34.04781	-1.2875977	HIST3H2A	histone cluster 3, H2a
3997	9.00E-18	1.86E-19	-13.4237152	33.98132	-1.42885326	GPX4	glutathione peroxidase 4
11492	9.00E-18	1.86E-19	-13.3235499	33.95315	-1.51706317	CORT	cortistatin
10793	1.15E-17	2.45E-19	-15.5969666	33.91606	-1.61753948	LINC00158	long intergenic non-protein coding RNA 158
19419	9.42E-18	1.96E-19	-13.4066579	33.91286	-1.49590515	IFT22	intraflagellar transport 22
5661	1.03E-17	2.15E-19	-13.5895395	33.85831	-1.79794061	AGPAT5	1-acylglycerol-3-phosphate O-acyltransferase 5
7517	1.04E-17	2.19E-19	-13.5848459	33.84343	-2.42237943	CDKN3	cyclin dependent kinase inhibitor 3
7372	1.06E-17	2.23E-19	-13.6910607	33.83518	-1.49596357	H3F3B	H3 histone, family 3B
19536	1.04E-17	2.18E-19	-13.2760261	33.79438	-1.09058643	STAT4	signal transducer and activator of transcription 4
16591	1.09E-17	2.31E-19	-13.2591223	33.73784	-1.402775	CDC14B	cell division cycle 14B
8500	1.11E-17	2.36E-19	-13.3507879	33.72915	-1.32673157	AURKA	aurora kinase A
1849	1.19E-17	2.54E-19	-13.4301121	33.66687	-1.54426347	PPP1R2	protein phosphatase 1 regulatory inhibitor subunit 2
13277	1.57E-17	3.40E-19	-15.2439348	33.57525	-2.6130515	SOX5	SRY-box 5
5697	1.35E-17	2.91E-19	-13.4951488	33.5697	-1.15790882	GRK4	G protein-coupled receptor kinase 4
14388	1.35E-17	2.90E-19	-13.1912837	33.51054	-1.44290967	SPAG8	sperm associated antigen 8
5230	1.52E-17	3.27E-19	-14.0706779	33.50939	-1.83147066	LECT2	leukocyte cell derived chemotaxin 2
6426	1.73E-17	3.78E-19	-15.000281	33.45361	-1.97441219	CMTM1	CKLF like MARVEL transmembrane domain containing 1
12082	1.64E-17	3.56E-19	-14.332531	33.45305	-2.15514669	CFAP45	cilia and flagella associated protein 45
20609	1.66E-17	3.62E-19	-13.2215684	33.30269	-1.32534416	PLEKHO1	pleckstrin homology domain containing O1
7445	1.65E-17	3.59E-19	-13.1277773	33.29721	-1.94860295	KLHDC9	kelch domain containing 9
4745	1.66E-17	3.63E-19	-13.1246888	33.28682	-1.61847476	COPRS	coordinator of PRMT5 and differentiation stimulator
13880	1.68E-17	3.68E-19	-13.2167407	33.28672	-1.04225299	RSPH14	radial spoke head 14 homolog
15962	1.73E-17	3.80E-19	-13.2069779	33.2544	-1.22209727	SPATA25	spermatogenesis associated 25
7655	1.83E-17	4.08E-19	-13.6140581	33.24867	-2.2650329	AXDND1	axonemal dynein light chain domain containing 1
8108	1.78E-17	3.94E-19	-13.100238	33.20453	-2.01223924	TCP11	t-complex 11
20778	1.84E-17	4.11E-19	-13.3873129	33.20211	-1.63420652	CFAP61	cilia and flagella associated protein 61
15713	2.06E-17	4.71E-19	-14.388245	33.19062	-1.57623694	AKAP14	A-kinase anchoring protein 14
19928	1.83E-17	4.06E-19	-13.1866967	33.18723	-1.18834256	TDP1	tyrosyl-DNA phosphodiesterase 1
21220	2.03E-17	4.62E-19	-14.0917872	33.18012	-2.30662957	DNAL1	dynein axonemal light chain 1
4611	1.84E-17	4.12E-19	-13.0869191	33.15968	-1.8435227	LYZL2	lysozyme like 2
4636	1.90E-17	4.28E-19	-13.1713168	33.13626	-2.00687671	SPANXD	SPANX family member D
16147	1.93E-17	4.35E-19	-13.1659984	33.11863	-1.98452257	MS4A6E	membrane spanning 4-domains A6E
486	1.99E-17	4.51E-19	-13.2541356	33.09491	-1.53771811	MYH3	myosin, heavy chain 3, skeletal muscle, embryonic
10048	1.99E-17	4.50E-19	-13.0612391	33.07313	-1.48563357	PRKAA1	protein kinase AMP-activated catalytic subunit alpha 1
15479	2.00E-17	4.54E-19	-13.0586907	33.06454	-1.17003493	SLC25A19	solute carrier family 25 member 19
14715	2.08E-17	4.77E-19	-13.1382586	33.02659	-2.55468852	LDHC	lactate dehydrogenase C
998	2.08E-17	4.76E-19	-13.0441488	33.01548	-2.09456548	ART5	ADP-ribosyltransferase 5
19775	2.67E-17	6.38E-19	-15.1947149	32.96623	-1.49493735	FAM161B	family with sequence similarity 161 member B
615	2.30E-17	5.36E-19	-13.5256756	32.96454	-2.7905555	ODF2	outer dense fiber of sperm tails 2
7624	2.21E-17	5.12E-19	-13.1173897	32.95729	-1.99272024	C11orf65	chromosome 11 open reading frame 65
738	2.57E-17	6.11E-19	-14.4554359	32.95426	-1.17160761	RAB27B	RAB27B, member RAS oncogene family
17054	2.35E-17	5.51E-19	-13.6354543	32.95123	-2.71790628	BBS5	Bardet-Biedl syndrome 5
21955	2.44E-17	5.77E-19	-13.6203326	32.92626	-1.76616156	SPATA3	spermatogenesis associated 3
7797	2.28E-17	5.30E-19	-13.0128218	32.90971	-1.31227827	AP2B1	adaptor related protein complex 2 beta 1 subunit
6173	2.32E-17	5.41E-19	-13.0067306	32.88913	-2.00912454	PTTG1	pituitary tumor-transforming 1
19439	2.40E-17	5.64E-19	-13.0878907	32.87287	-1.32154693	ICA1	islet cell autoantigen 1
9223	2.35E-17	5.51E-19	-13.0012599	32.87065	-2.86488829	SPA17	sperm autoantigenic protein 17
13779	3.32E-17	8.05E-19	-16.6689347	32.83323	-2.79802422	FAM71B	family with sequence similarity 71 member B
187	2.58E-17	6.14E-19	-13.2623511	32.80107	-2.4568674	PIH1D2	PIH1 domain containing 2
22543	2.89E-17	6.94E-19	-13.3309961	32.71712	-1.24126481	PRSS55	protease, serine 55
11949	2.85E-17	6.82E-19	-13.0313093	32.68466	-1.27820778	PHOSPHO2	phosphatase, orphan 2
14173	3.04E-17	7.33E-19	-13.5418847	32.67753	-1.06886449	TEX13A	testis expressed 13A
16242	3.26E-17	7.86E-19	-12.9886325	32.52843	-1.78426307	STK33	serine/threonine kinase 33
3444	3.32E-17	8.02E-19	-13.0790333	32.52178	-2.30578465	ROPN1	rhophilin associated tail protein 1
22207	3.64E-17	8.95E-19	-13.2509154	32.46387	-1.315175	SWT1	SWT1, RNA endoribonuclease homolog
20086	3.65E-17	9.00E-19	-13.3591899	32.45925	-2.69704433	GK2	glycerol kinase 2
22491	3.98E-17	9.87E-19	-13.8270491	32.44221	-1.35831912	G3BP2	G3BP stress granule assembly factor 2
3137	3.67E-17	9.06E-19	-13.0420536	32.4273	-2.51509246	MLF1	myeloid leukemia factor 1
10263	3.59E-17	8.79E-19	-12.8636401	32.40428	-2.97227798	DYNLRB2	dynein light chain roadblock-type 2
15131	3.86E-17	9.56E-19	-13.0256586	32.34628	-2.24618103	CMTM2	CKLF like MARVEL transmembrane domain containing 2
15678	4.33E-17	1.10E-18	-13.6573866	32.30465	-1.14098114	SHOX2	short stature homeobox 2
1944	4.18E-17	1.04E-18	-13.2030866	32.28715	-1.37987034	GMPS	guanine monophosphate synthase
12333	4.28E-17	1.07E-18	-13.4175698	32.28635	-1.65641424	LANCL1	LanC like 1
10208	4.29E-17	1.08E-18	-13.1927462	32.26695	-1.44638629	UBXN10	UBX domain protein 10
1049	4.42E-17	1.12E-18	-13.0758264	32.21196	-1.0040547	CEP76	centrosomal protein 76
6761	4.33E-17	1.09E-18	-12.8902128	32.19917	-1.41734001	C11orf63	chromosome 11 open reading frame 63
880	4.89E-17	1.27E-18	-13.8808118	32.19119	-1.36937108	ELL	elongation factor for RNA polymerase II
18642	4.33E-17	1.09E-18	-12.8008489	32.19067	-1.27798503	CLMN	calmin
8570	4.42E-17	1.12E-18	-12.7916789	32.15944	-1.77907171	CATSPER2	cation channel sperm associated 2
21140	5.24E-17	1.37E-18	-13.8527009	32.12655	-1.75905539	STT3B	STT3B, catalytic subunit of the oligosaccharyltransferase complex
1445	4.81E-17	1.24E-18	-13.1487837	32.11418	-2.43634078	DYRK3	dual specificity tyrosine phosphorylation regulated kinase 3
17250	4.75E-17	1.22E-18	-12.9516761	32.1024	-1.83133577	HIST1H2AG	histone cluster 1, H2ag
3565	4.70E-17	1.20E-18	-12.7719984	32.09236	-1.72958479	SCCPDH	saccharopine dehydrogenase (putative)
8063	4.89E-17	1.27E-18	-12.8466748	32.0531	-1.45475906	PPM1G	protein phosphatase, Mg2+/Mn2+ dependent 1G
6793	5.17E-17	1.35E-18	-13.0196119	32.0162	-1.75444491	CHKA	choline kinase alpha
12732	5.69E-17	1.49E-18	-13.6838176	32.01058	-1.19606198	ALLC	allantoicase
19022	5.12E-17	1.33E-18	-12.8312669	32.00136	-1.83906324	SLC2A5	solute carrier family 2 member 5
14507	5.12E-17	1.33E-18	-12.7416188	31.98871	-1.08562829	ELL3	elongation factor for RNA polymerase II 3
2587	6.18E-17	1.64E-18	-12.9598884	31.83563	-2.22433372	HRASLS	HRAS like suppressor
21457	5.99E-17	1.58E-18	-12.7805458	31.83078	-1.38680187	C22orf23	chromosome 22 open reading frame 23
8087	5.94E-17	1.57E-18	-12.6947177	31.82847	-1.06906388	POLB	DNA polymerase beta
3776	6.04E-17	1.60E-18	-12.7773168	31.81991	-1.45728852	IFT57	intraflagellar transport 57
127	6.44E-17	1.72E-18	-12.9450472	31.78733	-2.15562519	EFHB	EF-hand domain family member B
7116	6.44E-17	1.72E-18	-12.6670453	31.73379	-1.08984282	GEMIN4	gem nuclear organelle associated protein 4
7496	6.50E-17	1.74E-18	-12.7517212	31.7337	-2.23072439	CCT6B	chaperonin containing TCP1 subunit 6B
21970	6.96E-17	1.90E-18	-13.0152011	31.71357	-1.80758856	TTC12	tetratricopeptide repeat domain 12
15733	6.79E-17	1.84E-18	-12.8278785	31.69272	-1.39175431	NUDT21	nudix hydrolase 21
6662	8.43E-17	2.33E-18	-14.662123	31.6801	-1.28768989	HSPB7	heat shock protein family B (small) member 7
13430	6.75E-17	1.83E-18	-12.6500239	31.6755	-1.31054968	SPATA7	spermatogenesis associated 7
15330	6.87E-17	1.87E-18	-12.6431035	31.65179	-1.40306111	DDX39A	DEAD-box helicase 39A
12514	7.12E-17	1.95E-18	-12.6311731	31.6109	-1.11620754	DCAF6	DDB1 and CUL4 associated factor 6
4587	9.30E-17	2.60E-18	-14.6163428	31.56801	-2.70188926	ASB17	ankyrin repeat and SOCS box containing 17
2335	7.90E-17	2.17E-18	-12.8746219	31.55773	-1.08597508	PTBP3	polypyrimidine tract binding protein 3
8152	7.96E-17	2.19E-18	-12.5975832	31.49568	-1.05348105	CPSF3	cleavage and polyadenylation specific factor 3
17065	1.14E-16	3.32E-18	-16.9728822	31.47195	-1.8829497	ADTRP	androgen dependent TFPI regulating protein
8949	8.33E-17	2.29E-18	-12.6708601	31.46077	-2.37681421	RIBC2	RIB43A domain with coiled-coils 2
3245	8.41E-17	2.32E-18	-12.5804291	31.43678	-1.53157918	ZMYND12	zinc finger MYND-type containing 12
2874	8.95E-17	2.49E-18	-12.7372265	31.39145	-2.08782254	SLC9B1	solute carrier family 9 member B1
9376	8.95E-17	2.49E-18	-12.5595453	31.36503	-2.69725927	GKAP1	G kinase anchoring protein 1
4157	9.49E-17	2.68E-18	-12.9086919	31.35849	-1.15531283	GCNT3	glucosaminyl (N-acetyl) transferase 3, mucin type
5252	9.49E-17	2.68E-18	-12.8096976	31.34549	-1.02745743	USP6NL	USP6 N-terminal like
18912	9.18E-17	2.56E-18	-12.5515664	31.3376	-1.74074819	ZMYND10	zinc finger MYND-type containing 10
20190	9.32E-17	2.62E-18	-12.6316406	31.32808	-1.26302192	RFX3	regulatory factor X3
5804	1.12E-16	3.27E-18	-13.8364707	31.27755	-1.26946495	TCEB3B	transcription elongation factor B subunit 3B
17914	1.10E-16	3.20E-18	-13.5557673	31.26719	-2.94014339	SPATA17	spermatogenesis associated 17
12596	9.74E-17	2.77E-18	-12.5289881	31.25994	-1.33251537	LZIC	leucine zipper and CTNNBIP1 domain containing
16032	1.06E-16	3.06E-18	-13.0785355	31.25221	-1.17364888	RERE	arginine-glutamic acid dipeptide repeats
15108	1.04E-16	2.97E-18	-12.5087904	31.1904	-1.67274521	DZIP1	DAZ interacting zinc finger protein 1
15722	1.06E-16	3.05E-18	-12.5868263	31.17623	-1.89498108	TTC39A	tetratricopeptide repeat domain 39A
6275	1.06E-16	3.05E-18	-12.5010266	31.16366	-1.58522746	LRRC34	leucine rich repeat containing 34
20180	1.10E-16	3.17E-18	-12.6646885	31.14962	-1.35420841	CYB5R2	cytochrome b5 reductase 2
21758	1.16E-16	3.40E-18	-12.9373088	31.14723	-1.00048506	APOPT1	apoptogenic 1, mitochondrial
6035	1.15E-16	3.36E-18	-12.9408009	31.14496	-1.6682393	PYROXD1	pyridine nucleotide-disulphide oxidoreductase domain 1
18516	1.10E-16	3.17E-18	-12.5749861	31.13606	-1.42431587	PDXK	pyridoxal (pyridoxine, vitamin B6) kinase
7146	1.13E-16	3.31E-18	-12.4772345	31.08167	-1.05756588	MTFR1	mitochondrial fission regulator 1
16101	1.15E-16	3.38E-18	-12.4712859	31.06115	-1.79823652	RNFT1	ring finger protein, transmembrane 1
1892	1.24E-16	3.68E-18	-12.8105915	31.04229	-1.08658444	GOSR2	golgi SNAP receptor complex member 2
12810	1.19E-16	3.50E-18	-12.4612068	31.02639	-2.26357474	TTC21A	tetratricopeptide repeat domain 21A
2185	1.24E-16	3.66E-18	-12.6221992	31.00764	-1.22884299	CEBPG	CCAAT/enhancer binding protein gamma
13770	1.27E-16	3.76E-18	-12.6136718	30.9942	-1.29364364	TAF9	TATA-box binding protein associated factor 9
2583	1.42E-16	4.29E-18	-13.3236746	30.96043	-1.33532199	C4orf46	chromosome 4 open reading frame 46
12219	1.41E-16	4.23E-18	-12.8689482	30.95415	-3.40386377	TNP1	transition protein 1
8261	1.62E-16	4.96E-18	-14.3564883	30.92703	-2.25572441	PPEF1	protein phosphatase with EF-hand domain 1
18132	1.85E-16	5.71E-18	-16.3212791	30.92378	-2.49209967	C4orf45	chromosome 4 open reading frame 45
1186	1.37E-16	4.09E-18	-12.5003549	30.88248	-1.19129698	PCYT2	phosphate cytidylyltransferase 2, ethanolamine
15766	1.41E-16	4.21E-18	-12.4917476	30.85318	-1.05840128	AGBL5	ATP/GTP binding protein like 5
8097	1.85E-16	5.71E-18	-14.7022494	30.8218	-2.24645422	ADCY10	adenylate cyclase 10, soluble
2037	1.58E-16	4.82E-18	-12.6316939	30.77577	-1.59435578	FTMT	ferritin mitochondrial
20647	1.67E-16	5.10E-18	-13.0260552	30.77065	-1.05689835	GGN	gametogenetin
1447	1.54E-16	4.67E-18	-12.4618137	30.76702	-1.16877452	SPACA4	sperm acrosome associated 4
14812	1.53E-16	4.66E-18	-12.3786059	30.74098	-1.0339785	JMJD1C-AS1	JMJD1C antisense RNA 1
15400	1.75E-16	5.38E-18	-13.0088306	30.69252	-2.53967506	PRPS1L1	phosphoribosyl pyrophosphate synthetase 1-like 1
13853	2.14E-16	6.74E-18	-15.0885654	30.69225	-2.67946033	OLAH	oleoyl-ACP hydrolase
8730	1.62E-16	4.95E-18	-12.3611476	30.68054	-1.20084241	PPP1R35	protein phosphatase 1 regulatory subunit 35
6798	1.69E-16	5.18E-18	-12.3476721	30.63386	-1.71756217	KPNA2	karyopherin subunit alpha 2
15660	2.39E-16	7.68E-18	-15.2822222	30.58081	-1.95697625	VPS4B	vacuolar protein sorting 4 homolog B
22314	1.92E-16	5.98E-18	-12.6611136	30.57275	-1.70862951	MRGBP	MRG/MORF4L binding protein
19898	1.89E-16	5.86E-18	-12.5723851	30.56502	-1.31884296	DRC7	dynein regulatory complex subunit 7
2261	1.86E-16	5.75E-18	-12.400767	30.55895	-1.39158345	ODF1	outer dense fiber of sperm tails 1
8734	2.06E-16	6.48E-18	-13.1841668	30.54912	-2.53820077	HSPA4L	heat shock protein family A (Hsp70) member 4 like
30	1.90E-16	5.91E-18	-12.570109	30.54246	-1.27385433	DRG1	developmentally regulated GTP binding protein 1
12761	2.32E-16	7.36E-18	-14.1992019	30.53513	-1.6872362	ABHD2	abhydrolase domain containing 2
9887	1.88E-16	5.83E-18	-12.3966483	30.5289	-1.15003556	RNF168	ring finger protein 168
8111	1.98E-16	6.19E-18	-12.74955	30.52252	-1.80845393	TSNAXIP1	translin associated factor X interacting protein 1
1128	2.60E-16	8.40E-18	-15.5105713	30.50861	-2.1239913	IL20RB	interleukin 20 receptor subunit beta
11599	1.97E-16	6.16E-18	-12.4671758	30.50322	-2.58865179	C17orf64	chromosome 17 open reading frame 64
19196	2.06E-16	6.47E-18	-12.3661224	30.44065	-1.08178891	TEX37	testis expressed 37
102	2.18E-16	6.86E-18	-12.3491282	30.38257	-1.72792179	PFKP	phosphofructokinase, platelet
10780	2.24E-16	7.08E-18	-12.5153424	30.37632	-1.11963216	GNG2	G protein subunit gamma 2
17308	2.30E-16	7.30E-18	-12.3312782	30.30531	-1.03764611	FBXW5	F-box and WD repeat domain containing 5
1196	2.32E-16	7.40E-18	-12.327269	30.29158	-1.10434606	AMZ2	archaelysin family metallopeptidase 2
19441	3.22E-16	1.08E-17	-15.3921859	30.26186	-1.5413342	NFYA	nuclear transcription factor Y subunit alpha
3835	2.61E-16	8.45E-18	-12.8625857	30.25475	-1.16046615	PDK1	pyruvate dehydrogenase kinase 1
9484	2.53E-16	8.15E-18	-12.2989629	30.19457	-1.07512772	TPP2	tripeptidyl peptidase 2
20314	2.58E-16	8.32E-18	-12.2116548	30.16142	-1.40698687	EFHC1	EF-hand domain containing 1
10072	2.77E-16	9.07E-18	-12.4409552	30.12961	-1.24456845	B9D1	B9 domain containing 1
20535	2.77E-16	9.09E-18	-12.5330571	30.12594	-1.39582334	GTF3C4	general transcription factor IIIC subunit 4
16960	3.00E-16	9.95E-18	-12.9217654	30.10578	-1.1284777	KLHL41	kelch like family member 41
1345	2.80E-16	9.20E-18	12.3483661	30.087	1.32377072	CRYAB	crystallin alpha B
2670	3.50E-16	1.18E-17	-14.1974614	30.08576	-2.52365083	CCNA1	cyclin A1
6282	2.83E-16	9.32E-18	-12.1791324	30.04811	-1.36868644	TDRD7	tudor domain containing 7
10448	2.87E-16	9.48E-18	-12.1741684	30.0308	-1.14806058	HDGFL1	hepatoma derived growth factor-like 1
5933	3.34E-16	1.12E-17	-13.1225983	30.01475	-1.72068258	BRAP	BRCA1 associated protein
9938	3.89E-16	1.34E-17	-14.5559375	29.994	-1.22899816	XPO7	exportin 7
20571	3.05E-16	1.02E-17	-12.2351425	29.99202	-1.91551309	LYAR	Ly1 antibody reactive
1001	3.65E-16	1.24E-17	-13.3547182	29.9452	-1.47549036	PPFIA1	PTPRF interacting protein alpha 1
4742	3.21E-16	1.07E-17	-12.3028451	29.93302	-1.14834344	YBX1	Y-box binding protein 1
2281	3.14E-16	1.05E-17	-12.1459068	29.9322	-1.42881805	SMCHD1	structural maintenance of chromosomes flexible hinge domain containing 1
12768	3.30E-16	1.11E-17	-12.2939511	29.9029	-2.44901463	PBK	PDZ binding kinase
17968	3.63E-16	1.24E-17	-12.8510417	29.89066	-1.15894563	LARP1B	La ribonucleoprotein domain family member 1B
9888	3.30E-16	1.11E-17	-12.2100288	29.88913	-1.29424166	JMY	junction mediating and regulatory protein, p53 cofactor
20281	3.30E-16	1.11E-17	-12.2093764	29.88688	-1.15652896	PCK2	phosphoenolpyruvate carboxykinase 2, mitochondrial
21604	3.56E-16	1.21E-17	-12.4463168	29.87269	-1.12774597	USP7	ubiquitin specific peptidase 7
19516	3.55E-16	1.20E-17	-12.4473046	29.86035	-1.07657491	TTC30B	tetratricopeptide repeat domain 30B
5119	3.51E-16	1.19E-17	-12.1898824	29.81979	-2.20800794	POM121L9P	POM121 transmembrane nucleoporin like 9, pseudogene
2928	4.80E-16	1.69E-17	-14.918053	29.79611	-2.53953693	PRKAR2A	protein kinase cAMP-dependent type II regulatory subunit alpha
16065	3.66E-16	1.25E-17	-12.1750722	29.76879	-1.16250985	C11orf74	chromosome 11 open reading frame 74
12888	4.06E-16	1.40E-17	-12.6992524	29.74831	-1.0161718	H1FOO	H1 histone family member O, oocyte specific
16382	4.09E-16	1.41E-17	-12.2215172	29.67362	-1.25501302	GOLGA6B	golgin A6 family member B
1425	4.46E-16	1.56E-17	-12.3688251	29.60276	-1.0175059	IQCE	IQ motif containing E
7281	4.36E-16	1.52E-17	-12.1182943	29.573	-2.44763139	TSGA10	testis specific 10
11269	4.55E-16	1.60E-17	-12.271791	29.54984	-1.14837969	FAM134A	family with sequence similarity 134 member A
14763	4.73E-16	1.66E-17	-12.0135784	29.46919	-1.60131532	GMNN	geminin, DNA replication inhibitor
19790	6.44E-16	2.35E-17	-14.5344829	29.45598	-2.58355464	SLC25A51	solute carrier family 25 member 51
7326	4.94E-16	1.74E-17	-12.0004584	29.42316	-2.16330599	CCNB2	cyclin B2
2404	5.14E-16	1.82E-17	-12.0654864	29.39053	-2.58203494	LCA5L	LCA5L, lebercilin like
8355	5.11E-16	1.81E-17	-11.9901265	29.3869	-1.68144564	ZPBP2	zona pellucida binding protein 2
6384	5.18E-16	1.84E-17	-11.9847334	29.36796	-1.52143123	RPL39L	ribosomal protein L39 like
2732	5.21E-16	1.85E-17	-11.9829999	29.36188	-1.17575151	TRIM13	tripartite motif containing 13
2456	5.46E-16	1.95E-17	-12.1272352	29.35315	-1.23581532	ETV2	ETS variant 2
3420	5.93E-16	2.13E-17	12.2744979	29.29208	1.11610042	NEU1	neuraminidase 1 (lysosomal sialidase)
904	6.07E-16	2.19E-17	-12.358983	29.27917	-2.44210475	DBF4	DBF4 zinc finger
793	5.78E-16	2.07E-17	-12.0290116	29.26428	-1.6004762	KYNU	kynureninase
20437	6.20E-16	2.24E-17	-12.3515369	29.255	-1.86410082	KRT23	keratin 23
5309	6.44E-16	2.35E-17	-11.9157391	29.12542	-1.54377798	ZNF473	zinc finger protein 473
12872	6.56E-16	2.40E-17	-11.9096384	29.10394	-1.17976484	PPP1R7	protein phosphatase 1 regulatory subunit 7
5840	7.14E-16	2.63E-17	-11.9598566	29.02446	-1.25522688	BVES	blood vessel epicardial substance
15288	8.34E-16	3.10E-17	-11.9133245	28.86275	-2.13131601	C10orf82	chromosome 10 open reading frame 82
3622	8.80E-16	3.29E-17	-12.1432931	28.85801	-1.86333753	AGBL2	ATP/GTP binding protein like 2
13226	8.45E-16	3.15E-17	-11.8331143	28.83416	-1.12972385	WDR62	WD repeat domain 62
19644	8.59E-16	3.20E-17	-11.9034379	28.82836	-3.66065619	ANKRD7	ankyrin repeat domain 7
18173	8.59E-16	3.21E-17	-11.9029771	28.82675	-1.68112621	FANK1	fibronectin type III and ankyrin repeat domains 1
12419	9.05E-16	3.40E-17	-12.0475439	28.81283	-1.06709924	LRR1	leucine rich repeat protein 1
13543	8.93E-16	3.34E-17	-11.8159057	28.77339	-1.36813889	KHDRBS3	KH RNA binding domain containing, signal transduction associated 3
6325	9.05E-16	3.40E-17	-11.886227	28.76845	-1.61686706	KIF15	kinesin family member 15
1351	9.54E-16	3.60E-17	-11.8698249	28.71133	-1.81528224	USP32	ubiquitin specific peptidase 32
17097	9.78E-16	3.71E-17	-11.8614264	28.68207	-1.66655372	FAM47B	family with sequence similarity 47 member B
2706	9.96E-16	3.79E-17	-11.7806603	28.64881	-1.47907284	GTSF1	gametocyte specific factor 1
11909	1.01E-15	3.85E-17	-11.8505711	28.64423	-1.1584623	MORF4L1	mortality factor 4 like 1
14897	1.09E-15	4.20E-17	-11.9850954	28.60197	-1.20924915	RFESD	Rieske Fe-S domain containing
8977	1.25E-15	4.87E-17	-13.0074072	28.60129	-1.2473488	SKIL	SKI-like proto-oncogene
12841	1.34E-15	5.25E-17	-13.6008646	28.59579	-2.81470164	CT83	cancer/testis antigen 83
16133	1.09E-15	4.19E-17	-11.826634	28.57859	-1.510524	SPATA8	spermatogenesis associated 8
5402	1.48E-15	5.87E-17	-14.1364548	28.542	-1.61495117	ZNF385D	zinc finger protein 385D
20317	1.13E-15	4.35E-17	-11.8157807	28.52287	-2.1809592	TKTL2	transketolase like 2
21619	1.30E-15	5.06E-17	-12.3935713	28.49829	-2.6323077	RPGRIP1	retinitis pigmentosa GTPase regulator interacting protein 1
17330	1.22E-15	4.75E-17	-11.7909299	28.45404	-1.33051319	PLK4	polo like kinase 4
14143	1.29E-15	5.03E-17	-11.7005808	28.36517	-1.15793126	SURF2	surfeit 2
20643	1.64E-15	6.53E-17	-13.1899177	28.36072	-1.3104225	C21orf91	chromosome 21 open reading frame 91
14367	1.85E-15	7.47E-17	-14.7403999	28.36042	-2.94566694	SCP2D1	SCP2 sterol binding domain containing 1
13764	1.34E-15	5.27E-17	-11.9176504	28.3565	-1.20629534	ADSSL1	adenylosuccinate synthase like 1
15631	1.33E-15	5.23E-17	-11.6899173	28.32734	-1.02572064	CLDND2	claudin domain containing 2
12028	1.39E-15	5.47E-17	-11.8269936	28.30732	-1.44728054	WDR5	WD repeat domain 5
1399	1.52E-15	6.04E-17	-12.2362178	28.2936	-1.6572375	ZNF507	zinc finger protein 507
8126	1.61E-15	6.40E-17	-12.4245132	28.26495	-1.23073891	MPP7	membrane palmitoylated protein 7
17213	1.52E-15	6.02E-17	-12.0493109	28.25171	-3.19260008	SPATA4	spermatogenesis associated 4
10644	1.43E-15	5.65E-17	-11.6679739	28.24945	-1.0372615	LINC00905	long intergenic non-protein coding RNA 905
2364	1.84E-15	7.40E-17	-12.9965369	28.21094	-1.50960184	FAM186B	family with sequence similarity 186 member B
21946	1.79E-15	7.19E-17	-12.3865934	28.17818	-1.90546179	LOC643406	uncharacterized LOC643406
14853	1.57E-15	6.26E-17	-11.7121177	28.16034	-1.52517922	GABPB2	GA binding protein transcription factor beta subunit 2
8218	1.68E-15	6.71E-17	-11.6196397	28.07767	-1.21817286	MS4A5	membrane spanning 4-domains A5
3304	1.92E-15	7.78E-17	-12.2561133	28.05513	-1.10386722	SEMA3D	semaphorin 3D
12402	1.86E-15	7.50E-17	-11.5884859	27.96679	-1.78194434	NKAPL	NFKB activating protein like
17868	2.10E-15	8.63E-17	-12.3268368	27.96576	-1.0363683	KPNA3	karyopherin subunit alpha 3
11072	2.50E-15	1.06E-16	-13.6859075	27.93668	-2.72775765	RNASE11	ribonuclease A family member 11 (inactive)
10391	1.97E-15	8.04E-17	-11.6407966	27.91013	-1.11545881	BTBD16	BTB domain containing 16
9765	2.27E-15	9.47E-17	-12.5207834	27.90421	-1.12393182	SAV1	salvador family WW domain containing protein 1
17468	1.98E-15	8.10E-17	-11.6385911	27.90238	-1.23111898	CST8	cystatin 8
6657	2.03E-15	8.32E-17	-11.7057058	27.88832	-2.67184169	SPAG6	sperm associated antigen 6
20940	2.26E-15	9.38E-17	-11.9150865	27.86113	-1.35636477	TMEM190	transmembrane protein 190
18928	2.69E-15	1.14E-16	-13.4693635	27.84818	-1.61161496	C2orf16	chromosome 2 open reading frame 16
11651	2.13E-15	8.77E-17	-11.6160611	27.84171	-1.32058547	RNF19B	ring finger protein 19B
4877	2.43E-15	1.02E-16	-12.3814233	27.81517	-1.8238867	STYX	serine/threonine/tyrosine interacting protein
18380	2.15E-15	8.84E-17	11.6136359	27.81468	1.05502659	HIVEP2	human immunodeficiency virus type I enhancer binding protein 2
15601	2.20E-15	9.11E-17	-11.7571632	27.81039	-1.31222908	GGA1	golgi associated, gamma adaptin ear containing, ARF binding protein 1
2085	2.21E-15	9.16E-17	-11.5324405	27.76702	-1.02734274	CYCS	cytochrome c, somatic
21364	2.47E-15	1.04E-16	-11.8837609	27.73998	-1.15491485	FXR1	FMR1 autosomal homolog 1
4383	2.99E-15	1.28E-16	-13.0916017	27.68954	-1.21436481	ANKMY1	ankyrin repeat and MYND domain containing 1
12479	2.49E-15	1.05E-16	-11.6385749	27.67385	-1.9437162	FAM216A	family with sequence similarity 216 member A
12310	3.32E-15	1.44E-16	-13.0480169	27.57443	-1.60262006	CCDC36	coiled-coil domain containing 36
1855	2.79E-15	1.19E-16	-11.6794098	27.56254	-1.35427983	KLB	klotho beta
3434	3.08E-15	1.32E-16	-12.2955232	27.5556	-1.49278465	CDKL2	cyclin dependent kinase like 2
8187	3.54E-15	1.55E-16	-13.1781054	27.51694	-1.76795884	SLC12A2	solute carrier family 12 member 2
7381	3.14E-15	1.35E-16	-12.1810614	27.51691	-2.98320218	DYDC1	DPY30 domain containing 1
4550	2.87E-15	1.23E-16	-11.5939322	27.50054	-1.174395	LRRC37A4P	leucine rich repeat containing 37 member A4, pseudogene
14887	3.02E-15	1.29E-16	-11.505687	27.43439	-1.76977437	FGFR1OP	FGFR1 oncogene partner
631	3.15E-15	1.36E-16	-11.7194611	27.42299	-1.19803304	SAC3D1	SAC3 domain containing 1
13973	3.47E-15	1.51E-16	-12.2511118	27.42101	-2.63120773	DKKL1	dickkopf like acrosomal protein 1
4628	3.43E-15	1.49E-16	-12.1503213	27.40685	-2.7036021	PDCL2	phosducin like 2
20742	4.80E-15	2.16E-16	-13.5830517	27.25039	-2.12543603	MAN1A1	mannosidase alpha class 1A member 1
1517	3.91E-15	1.72E-16	-11.7330381	27.20515	-1.51569279	KATNAL1	katanin catalytic subunit A1 like 1
19822	3.83E-15	1.68E-16	-11.5784945	27.19854	-2.01383141	MAEL	maelstrom spermatogenic transposon silencer
17794	3.75E-15	1.64E-16	-11.3694478	27.18385	-1.85111496	ADAD2	adenosine deaminase domain containing 2
22541	4.19E-15	1.85E-16	-11.6291748	27.15444	-1.29756277	ZNHIT2	zinc finger HIT-type containing 2
15632	4.83E-15	2.18E-16	-12.7448076	27.13898	-2.43514335	RNF32	ring finger protein 32
19763	4.36E-15	1.93E-16	-11.3934726	27.05673	-1.48327099	ZSCAN5A	zinc finger and SCAN domain containing 5A
12821	4.38E-15	1.94E-16	-11.3233881	27.01846	-1.00234803	NUDT1	nudix hydrolase 1
12172	6.10E-15	2.83E-16	-13.885552	27.01458	-1.55289573	WFDC11	WAP four-disulfide core domain 11
21659	4.75E-15	2.13E-16	-11.5097478	26.99995	-1.18417438	CREM	cAMP responsive element modulator
353	4.51E-15	2.00E-16	-11.3148721	26.98785	-1.35931853	RAB3IP	RAB3A interacting protein
21281	4.85E-15	2.19E-16	-11.5788918	26.98436	-1.12754996	RUVBL2	RuvB like AAA ATPase 2
321	4.85E-15	2.20E-16	11.5783087	26.96338	1.38611566	HEPH	hephaestin
19800	4.68E-15	2.09E-16	-11.3701132	26.95473	-1.09866152	KRT72	keratin 72
17906	4.68E-15	2.09E-16	-11.3700389	26.95447	-1.26870426	CCT2	chaperonin containing TCP1 subunit 2
19234	4.76E-15	2.14E-16	11.3638715	26.95188	1.06000384	SLC4A3	solute carrier family 4 member 3
5931	4.73E-15	2.12E-16	-11.2992503	26.93168	-1.43813918	WDR66	WD repeat domain 66
12527	4.74E-15	2.12E-16	-11.2984435	26.92878	-1.22437057	HMMR	hyaluronan mediated motility receptor
10004	4.82E-15	2.17E-16	-11.3594385	26.91687	-1.16010431	MUM1	melanoma associated antigen (mutated) 1
3266	6.37E-15	2.98E-16	-13.263211	26.90435	-1.40302809	LRRC39	leucine rich repeat containing 39
6591	4.97E-15	2.25E-16	11.2815527	26.86801	1.15786415	FBN1	fibrillin 1
1668	5.10E-15	2.32E-16	-11.341379	26.85278	-1.04321861	PPP3CC	protein phosphatase 3 catalytic subunit gamma
9436	5.21E-15	2.37E-16	-11.3348375	26.84893	-1.27946434	CDC42EP3	CDC42 effector protein 3
3511	5.76E-15	2.64E-16	-11.688681	26.80832	-1.41319875	WDR87	WD repeat domain 87
11728	5.76E-15	2.64E-16	11.3047027	26.74196	1.40140756	TBX2	T-box 2
4625	5.69E-15	2.60E-16	11.2416516	26.72433	1.21285355	EFNB1	ephrin B1
18494	5.91E-15	2.73E-16	11.4384814	26.71625	1.10564161	GPRASP1	G protein-coupled receptor associated sorting protein 1
632	7.06E-15	3.35E-16	-12.5891491	26.71223	-1.41468204	CPS1	carbamoyl-phosphate synthase 1
205	6.06E-15	2.82E-16	-11.356388	26.69031	-1.70688306	LRRC36	leucine rich repeat containing 36
2982	6.06E-15	2.81E-16	-11.2872629	26.66049	-1.308593	CNTD1	cyclin N-terminal domain containing 1
3335	6.50E-15	3.06E-16	-11.5606211	26.64704	-1.39489831	ADAM29	ADAM metallopeptidase domain 29
5550	6.13E-15	2.86E-16	-11.2159939	26.63183	-1.40192309	HINT3	histidine triad nucleotide binding protein 3
8494	8.88E-15	4.33E-16	-13.9244949	26.61458	-2.36220801	TSSK6	testis specific serine kinase 6
17549	6.48E-15	3.04E-16	-11.3344074	26.5941	-1.24636839	DKFZp434L192	uncharacterized protein DKFZp434L192
4756	6.42E-15	3.01E-16	11.2681544	26.59251	1.07065103	HSPB2	heat shock protein family B (small) member 2
6204	6.52E-15	3.07E-16	-11.1964602	26.56136	-1.13274509	RSPH6A	radial spoke head 6 homolog A
4305	7.00E-15	3.32E-16	11.3819548	26.53966	1.08442094	LAMA2	laminin subunit alpha 2
3976	6.89E-15	3.26E-16	-11.2459018	26.51328	-1.48985022	CCDC150	coiled-coil domain containing 150
11780	6.85E-15	3.23E-16	-11.1819684	26.50904	-1.14394958	CCNH	cyclin H
20234	7.52E-15	3.58E-16	-11.3594601	26.48189	-1.58037868	TNP2	transition protein 2
11674	8.56E-15	4.15E-16	-12.3796534	26.48059	-1.24126093	CLHC1	clathrin heavy chain linker domain containing 1
22046	7.56E-15	3.61E-16	-11.3577347	26.47593	-1.04094431	PKDREJ	polycystin (PKD) family receptor for egg jelly
9959	7.27E-15	3.46E-16	11.1631173	26.44096	1.16999907	UBQLN2	ubiquilin 2
5024	7.64E-15	3.65E-16	-11.2139568	26.39944	-2.28114853	BIRC5	baculoviral IAP repeat containing 5
19641	7.84E-15	3.75E-16	-11.2744779	26.38359	-1.17469753	APITD1	apoptosis-inducing, TAF9-like domain 1
15665	7.92E-15	3.80E-16	-11.1368922	26.34616	-1.55441241	CCDC42	coiled-coil domain containing 42
15566	8.11E-15	3.90E-16	-11.1951976	26.33254	-1.4279674	CDR2	cerebellar degeneration related protein 2
6898	8.15E-15	3.93E-16	-11.127945	26.31381	-1.82143403	MYCBP	MYC binding protein
15545	8.25E-15	3.98E-16	-11.1239613	26.29939	-1.03581354	TMEM116	transmembrane protein 116
6721	8.59E-15	4.18E-16	-11.2441876	26.27702	-2.34932157	SRSF12	serine and arginine rich splicing factor 12
17399	8.52E-15	4.12E-16	-11.114742	26.26604	-1.59834813	NCAPH	non-SMC condensin I complex subunit H
6618	8.64E-15	4.21E-16	-11.1090205	26.24533	-1.14469443	MED26	mediator complex subunit 26
5336	8.98E-15	4.38E-16	11.0976001	26.20399	1.11362677	PLOD1	procollagen-lysine,2-oxoglutarate 5-dioxygenase 1
4880	8.98E-15	4.39E-16	-11.0974925	26.2036	-1.12828173	DR1	down-regulator of transcription 1
18474	1.19E-14	5.97E-16	-12.8185345	26.1918	-1.08774552	LHX2	LIM homeobox 2
20156	9.43E-15	4.65E-16	-11.2139966	26.19024	-1.11364799	TEX2	testis expressed 2
5588	9.38E-15	4.61E-16	11.2163236	26.17889	1.2586898	PMP22	peripheral myelin protein 22
21781	1.01E-14	4.99E-16	-11.4149989	26.17748	-1.02043953	PTGES3L-AARSD1	PTGES3L-AARSD1 readthrough
158	9.42E-15	4.64E-16	-11.2147223	26.17325	-1.17188285	GTF2A2	general transcription factor IIA subunit 2
8937	9.43E-15	4.65E-16	-11.1463185	26.158	-1.35613601	RSPH1	radial spoke head 1 homolog
6588	9.53E-15	4.70E-16	-11.0782366	26.13385	-2.37889691	SPAG5	sperm associated antigen 5
12107	1.02E-14	5.07E-16	-11.2594106	26.09582	-2.31346864	CFAP43	cilia and flagella associated protein 43
5820	1.01E-14	5.00E-16	11.0613283	26.07258	1.40519372	SH3PXD2A	SH3 and PX domains 2A
11700	1.03E-14	5.11E-16	-11.0555856	26.05176	-1.10975129	CDC25C	cell division cycle 25C
7342	1.06E-14	5.28E-16	11.1107388	26.03077	1.09856185	REEP5	receptor accessory protein 5
4762	1.35E-14	6.89E-16	-12.20128	25.97417	-1.67807755	RDM1	RAD52 motif containing 1
21333	1.32E-14	6.72E-16	-11.4893179	25.926	-1.22939448	IL1RN	interleukin 1 receptor antagonist
497	1.30E-14	6.58E-16	-11.4960376	25.90991	-1.00790539	DUSP21	dual specificity phosphatase 21
20776	1.24E-14	6.25E-16	-11.199414	25.90644	-1.19435043	RAB11FIP5	RAB11 family interacting protein 5
15716	1.27E-14	6.42E-16	-11.1917839	25.87988	-1.32263922	PLSCR2	phospholipid scramblase 2
4929	1.23E-14	6.20E-16	11.0023737	25.85865	1.13313057	FUCA2	fucosidase, alpha-L- 2, plasma
18963	1.23E-14	6.23E-16	11.0010139	25.85371	1.19645937	LPAR1	lysophosphatidic acid receptor 1
16177	1.81E-14	9.50E-16	-12.972084	25.76768	-1.06947338	PPFIA2	PTPRF interacting protein alpha 2
9660	1.34E-14	6.79E-16	-10.977185	25.76713	-1.61372251	CCDC112	coiled-coil domain containing 112
1824	1.49E-14	7.68E-16	11.1406594	25.72259	1.08500071	TSPAN5	tetraspanin 5
11193	1.57E-14	8.08E-16	-11.1262427	25.65145	-1.09308282	KPNA4	karyopherin subunit alpha 4
8041	1.59E-14	8.21E-16	-10.9878536	25.59018	-2.27158363	TYMS	thymidylate synthetase
13239	2.37E-14	1.27E-15	-13.911252	25.58382	-2.41401366	SPATA9	spermatogenesis associated 9
15397	1.59E-14	8.19E-16	10.9256561	25.57966	1.07953865	LARP6	La ribonucleoprotein domain family member 6
7872	2.48E-14	1.34E-15	-14.152139	25.55376	-2.19870942	RSPH10B	radial spoke head 10 homolog B
16835	1.77E-14	9.26E-16	-10.8923035	25.45815	-1.11013476	PCMT1	protein-L-isoaspartate (D-aspartate) O-methyltransferase
16493	1.84E-14	9.69E-16	-10.9417781	25.42451	-1.1831117	RANBP9	RAN binding protein 9
1828	1.90E-14	9.99E-16	-10.9332793	25.41451	-1.88025025	KCTD19	potassium channel tetramerization domain containing 19
3967	1.93E-14	1.02E-15	-10.9926913	25.40809	-1.29206995	C2orf40	chromosome 2 open reading frame 40
3371	2.05E-14	1.09E-15	-11.2613313	25.39142	-1.00709977	ABL2	ABL proto-oncogene 2, non-receptor tyrosine kinase
3288	1.90E-14	1.00E-15	-10.9318741	25.38887	-1.18231271	PPP3R2	protein phosphatase 3 regulatory subunit B, beta
13577	2.76E-14	1.52E-15	-13.5842698	25.38521	-1.36716357	SPEF2	sperm flagellar 2
2524	1.89E-14	9.96E-16	-10.8722552	25.38505	-1.31925291	CSNK2A2	casein kinase 2 alpha 2
1378	2.09E-14	1.11E-15	10.9676964	25.31938	1.1111848	TGFBR2	transforming growth factor beta receptor 2
6922	2.04E-14	1.08E-15	-10.8494544	25.30186	-1.43719215	NUP88	nucleoporin 88
3613	2.12E-14	1.13E-15	-11.0301773	25.2958	-1.58439556	C9orf43	chromosome 9 open reading frame 43
10449	2.71E-14	1.49E-15	-12.3200129	25.25763	-1.04239544	SMC5	structural maintenance of chromosomes 5
9898	2.47E-14	1.34E-15	-11.2006594	25.2293	-1.31771143	BBOF1	basal body orientation factor 1
9771	2.25E-14	1.21E-15	-10.8192524	25.19157	-1.01134415	SRPK1	SRSF protein kinase 1
93	3.69E-14	2.13E-15	-15.6356147	25.19094	-1.92206134	UBE2U	ubiquitin conjugating enzyme E2 U (putative)
16659	2.41E-14	1.30E-15	-10.8610638	25.1337	-1.14421233	MUC1	mucin 1, cell surface associated
9458	2.79E-14	1.54E-15	-11.5963974	25.11986	-1.07374171	ATRIP	ATR interacting protein
15542	2.47E-14	1.34E-15	-10.7913821	25.0897	-1.46895024	PSD3	pleckstrin and Sec7 domain containing 3
980	2.59E-14	1.41E-15	-10.777833	25.04014	-2.28906015	C15orf48	chromosome 15 open reading frame 48
13345	2.69E-14	1.47E-15	-10.8893676	25.02038	-1.1100082	COL9A1	collagen type IX alpha 1 chain
8821	3.74E-14	2.16E-15	-13.0026478	24.99742	-1.91768496	NME8	NME/NM23 family member 8
18814	2.80E-14	1.55E-15	-10.8118931	24.95616	-1.13078171	OVOL2	ovo like zinc finger 2
1561	2.80E-14	1.55E-15	-10.8110932	24.95327	-2.20190951	TEX30	testis expressed 30
18554	3.02E-14	1.69E-15	-11.1305437	24.95313	-1.11693546	AP4S1	adaptor related protein complex 4 sigma 1 subunit
15829	2.86E-14	1.59E-15	-10.7441721	24.91693	-1.21888001	COL9A3	collagen type IX alpha 3 chain
714	3.02E-14	1.69E-15	-10.9847667	24.90939	-1.28356505	IQCK	IQ motif containing K
5983	3.02E-14	1.69E-15	-10.7280739	24.85796	-1.09030243	FOXJ1	forkhead box J1
13988	3.10E-14	1.75E-15	-10.7788192	24.85761	-1.07261367	ORC2	origin recognition complex subunit 2
22405	3.45E-14	1.98E-15	-11.0099456	24.82679	-1.6621372	ATP8B3	ATPase phospholipid transporting 8B3
7660	3.37E-14	1.93E-15	-10.9464233	24.79628	-1.21764305	IP6K1	inositol hexakisphosphate kinase 1
12070	4.83E-14	2.89E-15	-13.7760662	24.79229	-2.31456375	C1orf105	chromosome 1 open reading frame 105
8050	3.28E-14	1.87E-15	-10.7605209	24.79145	-1.25537379	PLEKHB2	pleckstrin homology domain containing B2
1141	3.28E-14	1.86E-15	-10.8234751	24.78534	-1.61784486	LDHAL6B	lactate dehydrogenase A like 6B
11686	3.24E-14	1.84E-15	-10.7645105	24.78481	-1.30104552	FAM83F	family with sequence similarity 83 member F
1535	3.35E-14	1.91E-15	-10.6945935	24.73523	-1.08359247	ATAD2	ATPase family, AAA domain containing 2
3755	4.66E-14	2.78E-15	-12.712671	24.72897	-2.57349017	C7orf62	chromosome 7 open reading frame 62
2363	3.71E-14	2.14E-15	-11.06038	24.71711	-1.62322711	PCM1	pericentriolar material 1
11234	3.41E-14	1.95E-15	-10.6882568	24.71198	-1.06490517	KATNA1	katanin catalytic subunit A1
18045	3.56E-14	2.05E-15	-10.675718	24.66597	-1.00433073	DNAJC2	DnaJ heat shock protein family (Hsp40) member C2
12975	3.94E-14	2.30E-15	-11.039758	24.64762	-1.63635721	DYX1C1	dyslexia susceptibility 1 candidate 1
569	3.73E-14	2.15E-15	-10.7826175	24.63935	-1.17560039	PRB1	proline rich protein BstNI subfamily 1
4061	5.63E-14	3.41E-15	-13.4467515	24.60386	-2.54649494	TTLL2	tubulin tyrosine ligase like 2
20420	3.79E-14	2.20E-15	10.65567	24.59237	1.16528566	NFIA	nuclear factor I A
21875	4.01E-14	2.35E-15	-10.8227173	24.58673	-1.66336059	MCM4	minichromosome maintenance complex component 4
15415	3.81E-14	2.22E-15	-10.6540287	24.58635	-1.66865925	FBXO15	F-box protein 15
19614	3.92E-14	2.29E-15	-10.6454424	24.55481	-1.41546186	TPGS2	tubulin polyglutamylase complex subunit 2
3498	4.06E-14	2.39E-15	-10.6340811	24.51307	-1.01476838	DOT1L	DOT1 like histone lysine methyltransferase
18420	4.43E-14	2.63E-15	-10.9269237	24.49964	-1.7932988	ZWILCH	zwilch kinetochore protein
21067	4.43E-14	2.63E-15	-10.7905162	24.47312	-1.08464591	RANBP17	RAN binding protein 17
17861	4.42E-14	2.61E-15	-10.6677057	24.45527	-1.22347016	CARHSP1	calcium regulated heat stable protein 1
21237	5.46E-14	3.29E-15	-11.8977442	24.44797	-3.13626426	CCDC110	coiled-coil domain containing 110
6267	4.43E-14	2.63E-15	-10.6660565	24.42794	-1.1180536	CCDC181	coiled-coil domain containing 181
6058	4.42E-14	2.61E-15	-10.6091506	24.42142	-1.11108543	HSPA2	heat shock protein family A (Hsp70) member 2
15066	5.84E-14	3.56E-15	-12.1378353	24.40991	-1.00752425	EFCAB3	EF-hand calcium binding domain 3
6138	4.82E-14	2.88E-15	-10.9001806	24.38808	-1.38870296	CBLN1	cerebellin 1 precursor
17999	4.81E-14	2.87E-15	-10.7028025	24.37463	-1.00902666	TNC	tenascin C
7226	5.63E-14	3.42E-15	-11.4364406	24.34175	-1.59715402	SLC16A6	solute carrier family 16 member 6
15853	4.82E-14	2.88E-15	-10.6413044	24.33804	-1.31742854	CFAP36	cilia and flagella associated protein 36
4165	7.00E-14	4.35E-15	-12.5290911	24.28056	-1.34101874	PPP4R2	protein phosphatase 4 regulatory subunit 2
1592	5.97E-14	3.65E-15	-10.7630485	24.18013	-1.68655597	HIST1H2AD	histone cluster 1, H2ad
5642	6.30E-14	3.87E-15	-10.9604571	24.14099	-1.06533419	SIAH1	siah E3 ubiquitin protein ligase 1
2862	6.31E-14	3.88E-15	-10.8137963	24.13262	-1.15462699	ALKBH7	alkB homolog 7
13074	9.12E-14	5.88E-15	-13.6943813	24.10979	-1.74167622	ADAM20P1	ADAM metallopeptidase domain 20 pseudogene 1
7390	9.50E-14	6.13E-15	-13.9572412	24.0919	-2.43746277	MAK	male germ cell associated kinase
627	6.32E-14	3.88E-15	-10.8134186	24.08963	-1.52992983	HMGB3P1	high mobility group box 3 pseudogene 1
20228	7.79E-14	4.93E-15	-11.6349679	24.04307	-1.23616109	PRKG1	protein kinase, cGMP-dependent, type I
20909	6.39E-14	3.94E-15	-10.5552096	24.02481	-1.62561006	PRKCZ	protein kinase C zeta
15208	6.68E-14	4.13E-15	-10.6014787	24.01107	-1.36135068	LACTB2	lactamase beta 2
11497	7.11E-14	4.44E-15	-10.7074409	23.98601	-2.47201318	TUBA3D	tubulin alpha 3d
555	6.98E-14	4.34E-15	-10.7814644	23.97948	-3.19798742	CLGN	calmegin
5596	7.11E-14	4.44E-15	-10.6429482	23.95089	-1.09383368	NEK4	NIMA related kinase 4
5308	6.90E-14	4.28E-15	10.5324843	23.94199	1.01189473	LAMA4	laminin subunit alpha 4
1165	7.84E-14	4.97E-15	10.8856498	23.91191	1.46493733	SFRP4	secreted frizzled related protein 4
8842	7.19E-14	4.50E-15	-10.4624092	23.88057	-1.23628648	CCDC146	coiled-coil domain containing 146
12109	7.29E-14	4.57E-15	-10.4576973	23.86317	-1.01064572	TMEM99	transmembrane protein 99
3564	8.64E-14	5.53E-15	-11.2787789	23.85975	-1.43764118	ENKUR	enkurin, TRPC channel interacting protein
19554	7.31E-14	4.59E-15	-10.4567505	23.85967	-1.27576914	GLCCI1	glucocorticoid induced 1
9736	7.32E-14	4.60E-15	10.4563765	23.85829	1.41713315	ALDH1A3	aldehyde dehydrogenase 1 family member A3
7748	7.54E-14	4.76E-15	-10.5034422	23.83606	-1.26208441	CDC20	cell division cycle 20
9216	8.03E-14	5.12E-15	-10.7334581	23.83407	-1.17248503	MYCNOS	MYCN opposite strand
11354	7.61E-14	4.80E-15	10.4444812	23.81433	1.20083694	COX7A1	cytochrome c oxidase subunit 7A1
3306	7.85E-14	4.98E-15	-10.4910529	23.79085	-1.83881718	FBXL16	F-box and leucine rich repeat protein 16
14069	8.02E-14	5.11E-15	-10.4277225	23.75238	-1.26089258	CENPM	centromere protein M
3780	8.23E-14	5.25E-15	-10.4203719	23.7252	-1.01292568	LYPLA1	lysophospholipase I
2684	8.62E-14	5.52E-15	10.5210199	23.72153	1.01241191	CAMK2N1	calcium/calmodulin dependent protein kinase II inhibitor 1
10869	1.07E-13	6.96E-15	-11.7555039	23.71937	-1.02693126	FRMD6	FERM domain containing 6
3535	8.95E-14	5.74E-15	-10.7003286	23.69924	-2.10112185	OVOL1	ovo like transcriptional repressor 1
21268	8.65E-14	5.55E-15	-10.4613131	23.68224	-1.96129262	EID3	EP300 interacting inhibitor of differentiation 3
12938	9.08E-14	5.84E-15	10.5657774	23.65555	1.03451321	ZCCHC24	zinc finger CCHC-type containing 24
6758	9.12E-14	5.87E-15	-10.4459667	23.62616	-1.30325178	EXOSC9	exosome component 9
3166	9.54E-14	6.16E-15	-10.4326397	23.57743	-1.63222691	CCDC155	coiled-coil domain containing 155
12398	1.14E-13	7.48E-15	-11.180814	23.55861	-1.44913376	PRKD3	protein kinase D3
6333	1.03E-13	6.67E-15	10.3560131	23.48694	1.17358884	MSN	moesin
4196	1.04E-13	6.78E-15	10.4067088	23.48257	1.22049304	TIMP3	TIMP metallopeptidase inhibitor 3
5116	1.03E-13	6.71E-15	10.3542985	23.48059	1.09336232	CTSK	cathepsin K
5249	1.10E-13	7.19E-15	-10.5076461	23.44843	-1.66812084	MAPK1	mitogen-activated protein kinase 1
5656	1.14E-13	7.47E-15	-10.3802312	23.38563	-1.19504989	GGH	gamma-glutamyl hydrolase
18707	1.33E-13	8.85E-15	-10.7140677	23.33654	-1.41136765	THUMPD3	THUMP domain containing 3
6612	1.20E-13	7.92E-15	-10.3097095	23.31525	-1.33043571	AURKC	aurora kinase C
13296	1.23E-13	8.10E-15	10.3036381	23.29272	1.2931986	CBR3	carbonyl reductase 3
6709	1.25E-13	8.24E-15	-10.2990721	23.27578	-1.15064552	B3GALT4	beta-1,3-galactosyltransferase 4
20100	1.27E-13	8.44E-15	10.3469044	23.2635	1.06070548	TRIM56	tripartite motif containing 56
16719	1.34E-13	8.96E-15	-10.5075723	23.24115	-1.65045071	HORMAD2	HORMA domain containing 2
4502	1.36E-13	9.14E-15	-10.3253146	23.18432	-1.05347989	TIPIN	TIMELESS interacting protein
8393	1.40E-13	9.41E-15	10.4324449	23.17993	1.59904785	CFHR1	complement factor H related 1
20751	1.78E-13	1.22E-14	-10.4193258	22.92969	-1.1797972	CFAP70	cilia and flagella associated protein 70
8581	2.51E-13	1.79E-14	-12.4855833	22.92592	-1.57863889	SORBS1	sorbin and SH3 domain containing 1
14781	1.74E-13	1.19E-14	10.2531148	22.91916	1.18808379	LTBP4	latent transforming growth factor beta binding protein 4
13215	2.47E-13	1.75E-14	-11.4238558	22.79615	-1.10812635	ZNF546	zinc finger protein 546
21757	2.27E-13	1.61E-14	-10.4696988	22.72855	-1.33308468	MTCH2	mitochondrial carrier 2
19802	2.15E-13	1.51E-14	-10.1886925	22.68209	-1.11051522	PKMYT1	protein kinase, membrane associated tyrosine/threonine 1
1872	2.23E-13	1.57E-14	-10.1786568	22.64512	-1.05259829	ACRV1	acrosomal vesicle protein 1
8710	2.24E-13	1.58E-14	-10.1241771	22.62502	-1.31944136	SGO2	shugoshin 2
2809	2.55E-13	1.82E-14	-10.6460629	22.62244	-1.11201463	AKTIP	AKT interacting protein
8824	3.44E-13	2.56E-14	-12.5301462	22.59607	-1.51751503	EPHA6	EPH receptor A6
17319	3.46E-13	2.57E-14	-12.3307711	22.57723	-2.12672918	TMEM202	transmembrane protein 202
13213	2.48E-13	1.76E-14	10.0949115	22.51582	1.04900643	ANTXR2	anthrax toxin receptor 2
7104	2.51E-13	1.79E-14	10.1426742	22.51248	1.17292319	TSHZ1	teashirt zinc finger homeobox 1
12000	2.54E-13	1.81E-14	-10.1396683	22.50139	-2.34154072	GCC2	GRIP and coiled-coil domain containing 2
10860	2.54E-13	1.82E-14	-10.0871077	22.48669	-1.3716476	RAD51	RAD51 recombinase
6311	2.94E-13	2.14E-14	-10.6752423	22.47854	-1.70039163	USP29	ubiquitin specific peptidase 29
2032	2.84E-13	2.06E-14	-10.2728932	22.45642	-1.01765734	KDM1A	lysine demethylase 1A
81	2.84E-13	2.06E-14	10.2149026	22.42178	1.06904135	CTSB	cathepsin B
2144	3.10E-13	2.27E-14	10.5064613	22.41197	1.19140433	JAG1	jagged 1
13118	4.72E-13	3.63E-14	-13.9576405	22.40104	-1.7386	AGPAT3	1-acylglycerol-3-phosphate O-acyltransferase 3
3669	3.64E-13	2.72E-14	-11.3886101	22.37901	-1.40453967	KIAA0586	KIAA0586
4529	2.90E-13	2.10E-14	-10.1525318	22.36357	-1.09116505	PGAM2	phosphoglycerate mutase 2
4909	3.01E-13	2.19E-14	-10.1969436	22.33492	-1.48774115	CDK1	cyclin dependent kinase 1
21377	3.18E-13	2.34E-14	-10.1794703	22.31852	-1.12346061	PIGV	phosphatidylinositol glycan anchor biosynthesis class V
22245	3.28E-13	2.42E-14	-10.2274072	22.29505	-1.30975618	CCDC88A	coiled-coil domain containing 88A
6731	3.10E-13	2.27E-14	10.0280383	22.26596	1.30241221	P3H3	prolyl 3-hydroxylase 3
16433	3.28E-13	2.43E-14	-10.1137132	22.22192	-1.95831784	OIP5	Opa interacting protein 5
6143	3.22E-13	2.37E-14	10.0161698	22.22156	1.24270784	RHBDF2	rhomboid 5 homolog 2
7492	4.17E-13	3.15E-14	-11.2167242	22.21219	-3.40068801	TTC29	tetratricopeptide repeat domain 29
6865	3.43E-13	2.54E-14	9.9973091	22.15099	1.23512036	PDGFRB	platelet derived growth factor receptor beta
10441	3.61E-13	2.69E-14	-10.0328185	22.10667	-1.40767857	PSMC3IP	PSMC3 interacting protein
6603	4.93E-13	3.81E-14	-11.6665966	22.10276	-1.12558741	CTAGE15	CTAGE family member 15
18498	3.94E-13	2.95E-14	10.1145844	22.03795	1.07796322	SLC43A3	solute carrier family 43 member 3
13977	4.65E-13	3.57E-14	-10.442869	21.97391	-1.16945709	KIAA0226L	KIAA0226 like
21347	5.06E-13	3.92E-14	-10.6491608	21.94491	-1.11984875	PMS1	PMS1 homolog 1, mismatch repair system component
3255	4.26E-13	3.22E-14	9.9344047	21.91534	1.2800962	CLMP	CXADR like membrane protein
251	5.42E-13	4.23E-14	-10.8032421	21.86019	-1.02724221	NELL1	neural EGFL like 1
9533	4.76E-13	3.67E-14	-9.949043	21.8197	-3.20756463	SPATA22	spermatogenesis associated 22
4163	4.90E-13	3.78E-14	-10.0460191	21.79016	-1.91815158	CENPF	centromere protein F
7192	4.87E-13	3.76E-14	-9.9427302	21.77295	-1.08102539	C16orf71	chromosome 16 open reading frame 71
11781	4.97E-13	3.85E-14	9.9877598	21.76122	1.07874529	TXN	thioredoxin
11435	8.92E-13	7.37E-14	-13.561979	21.6991	-1.64674481	ACTRT1	actin related protein T1
20659	6.64E-13	5.31E-14	-11.147171	21.69374	-2.74066667	SPANXC	SPANX family member C
7480	5.42E-13	4.23E-14	-9.96182	21.68923	-2.72482912	SPINK2	serine peptidase inhibitor, Kazal type 2
10543	5.76E-13	4.54E-14	10.1093105	21.65641	1.19133843	FKBP9	FK506 binding protein 9
12699	5.62E-13	4.40E-14	-9.9000435	21.61453	-1.1324219	C21orf59	chromosome 21 open reading frame 59
2489	5.77E-13	4.55E-14	9.8423952	21.56997	1.05618929	MGP	matrix Gla protein
4106	7.83E-13	6.37E-14	-11.3304663	21.56774	-1.08426861	ZFY	zinc finger protein, Y-linked
9697	6.00E-13	4.75E-14	-9.8309967	21.52712	-1.03038536	DNAJC15	DnaJ heat shock protein family (Hsp40) member C15
3206	6.55E-13	5.23E-14	9.9044745	21.45567	1.27258636	APOL3	apolipoprotein L3
18780	6.54E-13	5.21E-14	9.8064855	21.43495	1.07202375	ST6GALNAC6	ST6 N-acetylgalactosaminide alpha-2,6-sialyltransferase 6
3440	7.41E-13	5.98E-14	10.0907015	21.39351	1.30920065	OSR2	odd-skipped related transciption factor 2
5404	7.11E-13	5.72E-14	9.7819169	21.3425	1.15280753	CASP4	caspase 4
516	8.11E-13	6.63E-14	-9.9455741	21.29003	-2.95844034	CENPU	centromere protein U
15982	8.25E-13	6.76E-14	-9.9967367	21.25887	-1.00062983	TMEM57	transmembrane protein 57
8369	8.23E-13	6.74E-14	-10.0566696	21.25291	-1.69779506	GRB10	growth factor receptor bound protein 10
13648	7.86E-13	6.40E-14	-9.7519111	21.22952	-1.09946846	CSE1L	chromosome segregation 1 like
19979	9.68E-13	8.11E-14	-10.5026574	21.19363	-1.76494096	TTBK2	tau tubulin kinase 2
21733	9.21E-13	7.68E-14	-9.904934	21.14439	-1.00606785	CETN1	centrin 1
18197	8.58E-13	7.06E-14	9.7734192	21.14355	1.06952774	GSN	gelsolin
248	9.10E-13	7.55E-14	9.909432	21.1356	1.08724055	FZD2	frizzled class receptor 2
19400	9.26E-13	7.72E-14	-9.7494583	21.07812	-1.38820892	GRAMD1C	GRAM domain containing 1C
19149	1.22E-12	1.04E-13	-10.599889	20.9791	-1.82119434	PHTF1	putative homeodomain transcription factor 1
1510	1.08E-12	9.07E-14	9.9138301	20.94264	1.001409	ITM2B	integral membrane protein 2B
7569	1.63E-12	1.44E-13	-11.6044176	20.846	-2.21978092	ZBBX	zinc finger B-box domain containing
17784	1.11E-12	9.42E-14	-9.6498948	20.84475	-1.08461222	PPP2R3C	protein phosphatase 2 regulatory subunit B''gamma
14399	1.18E-12	1.01E-13	9.6323561	20.77851	1.12650904	GLIPR2	GLI pathogenesis related 2
6139	1.27E-12	1.09E-13	-9.7557471	20.75905	-1.08589378	TUBB4A	tubulin beta 4A class IVa
19319	1.28E-12	1.10E-13	-9.6098265	20.69337	-1.49392154	RADIL	Rap associating with DIL domain
15633	1.29E-12	1.11E-13	9.6526711	20.69297	1.03353597	SSPN	sarcospan
11798	1.29E-12	1.11E-13	9.6076453	20.68512	1.04864891	PODN	podocan
13069	1.36E-12	1.17E-13	9.5919068	20.62562	1.41771153	LAG3	lymphocyte activating 3
16167	1.39E-12	1.20E-13	9.5859219	20.60298	1.06406368	BHLHE41	basic helix-loop-helix family member e41
13909	1.76E-12	1.56E-13	-10.5600476	20.59405	-1.29536352	CYTH3	cytohesin 3
9984	1.41E-12	1.22E-13	-9.5809638	20.58423	-1.40653006	CDCA8	cell division cycle associated 8
11405	1.43E-12	1.24E-13	9.6224818	20.5801	1.21867468	AKR1C1	aldo-keto reductase family 1 member C1
18761	1.44E-12	1.25E-13	-9.5752024	20.56244	-2.08392306	STAG3	stromal antigen 3
16833	1.44E-12	1.26E-13	-9.573443	20.55578	-1.00707334	SPDYE1	speedy/RINGO cell cycle regulator family member E1
6862	1.72E-12	1.52E-13	-10.1476084	20.53231	-1.4232531	FOXD1	forkhead box D1
19716	1.48E-12	1.29E-13	9.5661212	20.52808	1.06628429	F10	coagulation factor X
4284	1.51E-12	1.33E-13	-9.6523085	20.52627	-1.42312534	CDH18	cadherin 18
16425	1.60E-12	1.41E-13	-9.6365052	20.49178	-1.36097427	IFT88	intraflagellar transport 88
5710	1.57E-12	1.38E-13	-9.6422235	20.48897	-1.01918393	SOD2	superoxide dismutase 2, mitochondrial
9504	1.63E-12	1.43E-13	-9.6315225	20.47335	-1.0955878	CSPP1	centrosome and spindle pole associated protein 1
1907	2.21E-12	1.99E-13	-11.1681356	20.47145	-2.45146452	PPIL6	peptidylprolyl isomerase like 6
1899	2.93E-12	2.72E-13	-13.5072605	20.45937	-1.66829896	TNFRSF21	TNF receptor superfamily member 21
15855	1.58E-12	1.39E-13	-9.5470697	20.45597	-1.06375778	HSPA14	heat shock protein family A (Hsp70) member 14
20341	1.96E-12	1.75E-13	-9.967082	20.36243	-1.60600727	MYEF2	myelin expression factor 2
1168	1.95E-12	1.74E-13	-9.6777043	20.32687	-2.35910291	KRBOX1	KRAB box domain containing 1
18317	1.88E-12	1.68E-13	9.5417251	20.27775	1.0100015	ARL6IP5	ADP ribosylation factor like GTPase 6 interacting protein 5
21483	2.94E-12	2.73E-13	-11.5052104	20.24092	-2.34881648	PPP1R36	protein phosphatase 1 regulatory subunit 36
19210	2.68E-12	2.47E-13	-10.8288494	20.21428	-1.56916364	CATSPERD	cation channel sperm associated auxiliary subunit delta
19142	1.99E-12	1.78E-13	-9.4814349	20.20731	-1.86019249	FKBP6	FK506 binding protein 6
11068	2.12E-12	1.91E-13	9.4630168	20.13747	1.05073554	PTN	pleiotrophin
13921	3.73E-12	3.55E-13	-12.4388061	20.11035	-1.83287251	FSIP1	fibrous sheath interacting protein 1
12526	2.24E-12	2.03E-13	9.4475787	20.0789	1.32151517	FAM198B	family with sequence similarity 198 member B
13828	2.94E-12	2.73E-13	-10.5688339	20.07211	-1.2170215	TOPBP1	topoisomerase (DNA) II binding protein 1
22054	2.77E-12	2.55E-13	-9.9216849	20.05234	-1.86847277	LRRCC1	leucine rich repeat and coiled-coil centrosomal protein 1
2299	2.39E-12	2.18E-13	-9.4730733	20.02026	-1.84278459	RACGAP1	Rac GTPase activating protein 1
2025	2.65E-12	2.43E-13	9.5365154	19.95749	1.05527866	RILPL2	Rab interacting lysosomal protein like 2
20661	3.13E-12	2.93E-13	-9.879702	19.91273	-1.10875748	DHFR2	dihydrofolate reductase 2
3773	2.86E-12	2.64E-13	-9.4221269	19.82891	-1.50185008	TBX1	T-box 1
7010	3.14E-12	2.94E-13	-9.3500994	19.70863	-1.62298408	CKS2	CDC28 protein kinase regulatory subunit 2
20414	3.18E-12	2.98E-13	9.3896292	19.70673	1.26133484	INHA	inhibin alpha subunit
4532	4.74E-12	4.61E-13	-11.2863249	19.70614	-2.7155765	ADAM32	ADAM metallopeptidase domain 32
4868	3.38E-12	3.19E-13	-9.4626728	19.68646	-1.24965632	S100A8	S100 calcium binding protein A8
7802	3.22E-12	3.02E-13	9.3430183	19.68171	1.18643183	CDH11	cadherin 11
274	3.71E-12	3.54E-13	-9.3884975	19.54741	-1.09102228	ACOT13	acyl-CoA thioesterase 13
5768	3.89E-12	3.73E-13	-9.5187329	19.53205	-2.84276892	TESMIN	testis expressed metallothionein like protein
8258	4.19E-12	4.03E-13	-9.7213856	19.53116	-1.50799502	CXADR	coxsackie virus and adenovirus receptor
9943	3.85E-12	3.68E-13	-9.2911108	19.48419	-1.01634463	RFC4	replication factor C subunit 4
12122	4.01E-12	3.85E-13	9.2795804	19.44028	1.28582819	OGN	osteoglycin
6059	4.62E-12	4.47E-13	9.2820502	19.32669	1.33199573	KCNQ1	potassium voltage-gated channel subfamily Q member 1
11835	4.73E-12	4.60E-13	9.3182646	19.31052	1.30471654	TNFRSF14	TNF receptor superfamily member 14
2068	7.14E-12	7.24E-13	-11.4428377	19.30778	-1.74006186	WEE1	WEE1 G2 checkpoint kinase
6276	6.59E-12	6.63E-13	-10.8398044	19.29231	-1.07931539	IL17RD	interleukin 17 receptor D
13777	4.62E-12	4.48E-13	9.2401376	19.29001	1.0874723	LAMC3	laminin subunit gamma 3
15694	4.70E-12	4.55E-13	9.2774849	19.2844	1.39692616	CFH	complement factor H
1315	5.23E-12	5.13E-13	9.2891886	19.17729	1.31063851	SPARCL1	SPARC like 1
21191	6.88E-12	6.95E-13	-10.1506556	19.1376	-1.51367226	HYLS1	HYLS1, centriolar and ciliogenesis associated
10073	1.00E-11	1.05E-12	-12.7294097	19.11652	-2.07577932	GPR18	G protein-coupled receptor 18
13517	8.99E-12	9.30E-13	-11.7315727	19.11438	-2.98158943	ALS2CR11	amyotrophic lateral sclerosis 2 chromosome region candidate 11
22021	6.44E-12	6.45E-13	-9.7085627	19.11411	-2.51733253	CFAP53	cilia and flagella associated protein 53
8314	5.54E-12	5.46E-13	-9.1880264	19.09128	-1.1834487	KLHL7	kelch like family member 7
6069	5.57E-12	5.49E-13	9.1866473	19.08602	1.19617324	FYCO1	FYVE and coiled-coil domain containing 1
19023	5.79E-12	5.74E-13	-9.2161639	19.05303	-1.08075191	KIF2C	kinesin family member 2C
22265	7.94E-12	8.12E-13	-10.2907879	19.04057	-1.77341816	BEND7	BEN domain containing 7
20701	6.61E-12	6.65E-13	-9.4083367	19.01613	-2.70144644	RBMXL2	RNA binding motif protein, X-linked like 2
515	6.34E-12	6.34E-13	9.2765235	19.00096	1.35721001	AKR1C3	aldo-keto reductase family 1, member C3
4640	6.87E-12	6.93E-13	-9.208442	18.90078	-1.16232814	YEATS4	YEATS domain containing 4
11624	6.63E-12	6.67E-13	-9.1357701	18.89179	-1.51406076	HENMT1	HEN1 methyltransferase homolog 1
5177	6.98E-12	7.06E-13	-9.121253	18.83634	-1.38049283	PRSS21	protease, serine 21
15124	1.16E-11	1.23E-12	-11.598278	18.83075	-1.84981468	OXCT2	3-oxoacid CoA-transferase 2
10762	7.67E-12	7.82E-13	9.0942691	18.73322	1.22259178	TFPI	tissue factor pathway inhibitor
6244	7.72E-12	7.88E-13	9.092278	18.72561	1.01631188	HTRA1	HtrA serine peptidase 1
22516	1.10E-11	1.16E-12	-10.1668221	18.68668	-1.35148616	MTTP	microsomal triglyceride transfer protein
22572	1.13E-11	1.20E-12	-10.0579324	18.65651	-1.56312564	CARF	calcium responsive transcription factor
4238	8.71E-12	8.98E-13	-9.0584222	18.59614	-1.10471173	DONSON	downstream neighbor of SON
9134	8.75E-12	9.03E-13	-9.0569234	18.59041	-1.28835461	TUBB4B	tubulin beta 4B class IVb
6085	1.11E-11	1.18E-12	-9.888925	18.57252	-1.1751843	LACTB	lactamase beta
15258	1.91E-11	2.14E-12	-15.0216075	18.56479	-2.03932143	NAA38	N(alpha)-acetyltransferase 38, NatC auxiliary subunit
2192	9.27E-12	9.62E-13	9.0800708	18.53846	1.19710641	HSD17B11	hydroxysteroid 17-beta dehydrogenase 11
8032	9.85E-12	1.03E-12	9.0233444	18.46192	1.40708347	CFHR3	complement factor H related 3
16878	1.00E-11	1.05E-12	-9.0975204	18.46059	-1.25484334	CNN1	calponin 1
2614	1.06E-11	1.12E-12	9.0402718	18.38771	1.07708308	CEBPD	CCAAT/enhancer binding protein delta
8197	1.06E-11	1.12E-12	9.0008284	18.37571	1.32049875	IGF2	insulin like growth factor 2
16855	1.12E-11	1.19E-12	9.0241133	18.32647	1.09933904	COL1A1	collagen type I alpha 1 chain
18523	1.13E-11	1.20E-12	8.9818335	18.30296	1.28068231	H19	H19, imprinted maternally expressed transcript (non-protein coding)
15345	1.21E-11	1.29E-12	-9.0017597	18.24171	-3.05018828	HIST1H2AA	histone cluster 1, H2aa
22164	1.49E-11	1.62E-12	-9.3715266	18.23724	-1.44215458	USP44	ubiquitin specific peptidase 44
9550	1.70E-11	1.88E-12	-9.9053353	18.23567	-1.61494056	MS4A14	membrane spanning 4-domains A14
6822	1.28E-11	1.38E-12	-8.9470385	18.16963	-1.24832178	KIF2A	kinesin family member 2A
362	1.59E-11	1.75E-12	-9.6075528	18.14087	-1.14194196	KIF20A	kinesin family member 20A
1312	1.41E-11	1.53E-12	-9.174585	18.13155	-1.01638082	KHDC1	KH homology domain containing 1
11809	2.60E-11	3.00E-12	-11.6203143	18.01251	-1.58772125	PGR	progesterone receptor
10232	1.50E-11	1.63E-12	8.9024234	17.99855	1.02988743	LRP3	LDL receptor related protein 3
21578	1.92E-11	2.15E-12	-9.4097899	17.95611	-1.04587889	IGF2BP3	insulin like growth factor 2 mRNA binding protein 3
1309	2.32E-11	2.66E-12	-10.3065976	17.90262	-1.79997858	KPNA5	karyopherin subunit alpha 5
20559	1.66E-11	1.83E-12	8.910773	17.89637	1.12867873	EBF1	early B-cell factor 1
19106	1.68E-11	1.85E-12	8.8699553	17.87396	1.37688182	IGFBP4	insulin like growth factor binding protein 4
1071	3.36E-11	3.95E-12	-12.6411761	17.86698	-2.02765076	TNFAIP6	TNF alpha induced protein 6
4406	2.33E-11	2.66E-12	-9.8788536	17.81395	-1.01754447	C4orf36	chromosome 4 open reading frame 36
16943	1.79E-11	1.99E-12	8.851443	17.8029	1.10581937	FAM46A	family with sequence similarity 46 member A
17763	2.20E-11	2.50E-12	-9.3638702	17.77761	-1.41444515	ENTHD1	ENTH domain containing 1
1519	2.49E-11	2.86E-12	-9.9493502	17.76099	-1.32914013	MOV10L1	Mov10 RISC complex RNA helicase like 1
5935	1.99E-11	2.23E-12	8.8219239	17.68953	1.46681526	GREB1	growth regulation by estrogen in breast cancer 1
3925	2.05E-11	2.30E-12	8.8505468	17.66746	1.07467796	TRIM2	tripartite motif containing 2
21205	2.07E-11	2.33E-12	-8.8862365	17.66717	-1.211205	CDKN2D	cyclin dependent kinase inhibitor 2D
16011	2.04E-11	2.29E-12	-8.814934	17.66268	-1.5228968	TPTE	transmembrane phosphatase with tensin homology
12298	2.05E-11	2.30E-12	8.8134846	17.65711	1.20421007	TGFBI	transforming growth factor beta induced
2147	2.25E-11	2.57E-12	9.0790725	17.65457	1.2072932	PRDX2	peroxiredoxin 2
8972	2.22E-11	2.52E-12	-9.0843761	17.64923	-1.97550859	DLGAP5	DLG associated protein 5
15897	2.13E-11	2.40E-12	8.8399275	17.62708	1.48100772	FMOD	fibromodulin
19994	2.14E-11	2.42E-12	8.8009231	17.60885	1.11353786	ITPR1	inositol 1,4,5-trisphosphate receptor type 1
16949	2.20E-11	2.49E-12	-8.8298456	17.58873	-1.1968198	PLK2	polo like kinase 2
13010	2.54E-11	2.93E-12	-9.2550153	17.57738	-1.21131865	PSIP1	PC4 and SFRS1 interacting protein 1
1550	4.53E-11	5.48E-12	-12.815191	17.57165	-2.04182089	CCDC116	coiled-coil domain containing 116
11205	2.32E-11	2.65E-12	-8.8138238	17.52777	-1.1978913	PTBP2	polypyrimidine tract binding protein 2
3001	2.38E-11	2.72E-12	8.8448357	17.51131	1.0233079	CPQ	carboxypeptidase Q
8435	2.56E-11	2.95E-12	-8.94783	17.46682	-1.48952817	KIF5B	kinesin family member 5B
19977	2.50E-11	2.87E-12	8.7565134	17.43813	1.40911149	ADIRF	adipogenesis regulatory factor
13533	2.76E-11	3.20E-12	-9.0175004	17.43591	-1.03179075	B3GALNT2	beta-1,3-N-acetylgalactosaminyltransferase 2
4711	2.64E-11	3.06E-12	-8.9379412	17.43079	-2.1538126	ART3	ADP-ribosyltransferase 3
19081	2.80E-11	3.24E-12	-8.9667363	17.4096	-1.28358112	KIAA1324	KIAA1324
2430	3.21E-11	3.75E-12	9.1254845	17.37073	1.13216938	P2RX7	purinergic receptor P2X 7
12998	3.84E-11	4.57E-12	-10.1020153	17.3594	-1.8147733	SAG	S-antigen visual arrestin
6358	2.91E-11	3.38E-12	-8.826807	17.3069	-2.26482965	TEX14	testis expressed 14, intercellular bridge forming factor
22022	3.21E-11	3.76E-12	-8.8388451	17.26575	-1.5923873	OVOS2	ovostatin 2
3015	5.89E-11	7.31E-12	-10.9750296	17.08211	-1.39763939	PDE10A	phosphodiesterase 10A
12708	3.63E-11	4.31E-12	8.6867684	17.04375	1.36683917	C1R	complement C1r subcomponent
11491	4.01E-11	4.78E-12	8.6593832	16.9393	1.06772045	PRKAR2B	protein kinase cAMP-dependent type II regulatory subunit beta
3923	4.35E-11	5.23E-12	-8.710297	16.89789	-1.13686736	OGDH	oxoglutarate dehydrogenase
12530	4.29E-11	5.15E-12	-8.6767407	16.87728	-1.9618728	RNF17	ring finger protein 17
12764	6.90E-11	8.73E-12	-10.3770088	16.81418	-1.94609754	LOC81691	exonuclease NEF-sp
12990	4.51E-11	5.46E-12	-8.5900986	16.79739	-1.57969431	CDC45	cell division cycle 45
15492	8.43E-11	1.09E-11	-11.4616386	16.78469	-1.42564057	LRRC43	leucine rich repeat containing 43
7664	4.65E-11	5.64E-12	-8.5813907	16.76382	-1.09284111	STAG3L3	stromal antigen 3-like 3 (pseudogene)
6159	4.72E-11	5.73E-12	-8.5776353	16.74934	-1.08288176	C1orf112	chromosome 1 open reading frame 112
4854	4.72E-11	5.73E-12	8.5775385	16.74897	1.10253562	VEGFB	vascular endothelial growth factor B
20384	4.78E-11	5.81E-12	-8.5740636	16.73557	-1.00575385	FBXL18	F-box and leucine rich repeat protein 18
18198	4.81E-11	5.86E-12	8.5718205	16.72692	1.00014914	EMP2	epithelial membrane protein 2
20191	5.03E-11	6.13E-12	8.594487	16.69159	1.13292979	LAMP2	lysosomal associated membrane protein 2
21305	7.22E-11	9.18E-12	-9.5431539	16.66421	-2.1658393	DDX25	DEAD-box helicase 25
11272	5.32E-11	6.53E-12	8.6511808	16.65077	1.01581277	TXNIP	thioredoxin interacting protein
1941	5.56E-11	6.85E-12	8.6770599	16.63983	1.33261527	EMX2	empty spiracles homeobox 2
10853	5.24E-11	6.42E-12	8.5481911	16.63579	1.28908771	PERP	PERP, TP53 apoptosis effector
4754	5.29E-11	6.50E-12	8.5794513	16.63416	1.34932851	CD14	CD14 molecule
2150	5.62E-11	6.93E-12	8.756831	16.62708	1.23279717	PIR	pirin
302	6.44E-11	8.08E-12	8.6327864	16.53678	1.46592736	COL12A1	collagen type XII alpha 1 chain
15912	6.65E-11	8.37E-12	-8.7942406	16.51709	-1.11450211	BUB3	BUB3, mitotic checkpoint protein
17806	6.13E-11	7.64E-12	8.537212	16.49964	1.67175327	ANGPTL1	angiopoietin like 1
8188	6.20E-11	7.74E-12	8.5337184	16.45942	1.39979325	C1S	complement component 1, s subcomponent
20237	6.29E-11	7.88E-12	-8.5292726	16.44243	-2.77218613	DMRTB1	DMRT like family B with proline rich C-terminal 1
21401	6.85E-11	8.65E-12	8.6143028	16.43638	1.29628557	ZFP36L2	ZFP36 ring finger protein like 2
6989	6.35E-11	7.96E-12	8.4927768	16.42197	1.02686588	RAI2	retinoic acid induced 2
4019	6.36E-11	7.98E-12	8.4920993	16.41936	1.10023186	HYI	hydroxypyruvate isomerase (putative)
10972	6.64E-11	8.35E-12	-8.514123	16.41143	-1.63337174	CETN3	centrin 3
9859	6.50E-11	8.16E-12	8.4861966	16.39657	1.03331773	IFITM1	interferon induced transmembrane protein 1
2585	1.42E-10	1.92E-11	-12.0457722	16.32995	-2.58367357	SUN3	Sad1 and UNC84 domain containing 3
8034	1.38E-10	1.86E-11	-11.4433729	16.28295	-2.06290149	SPAG16	sperm associated antigen 16
3593	7.63E-11	9.74E-12	8.4739206	16.25777	1.0020012	ROBO4	roundabout guidance receptor 4
21233	7.84E-11	1.01E-11	8.536318	16.22054	1.00724904	NDN	necdin, MAGE family member
2458	1.00E-10	1.31E-11	-9.181252	16.17651	-1.26152439	MYO15A	myosin XVA
22308	8.62E-11	1.11E-11	-8.5091543	16.17459	-1.63933377	EZH2	enhancer of zeste 2 polycomb repressive complex 2 subunit
2426	1.04E-10	1.37E-11	8.4546652	15.94082	1.23695171	FCGR2B	Fc fragment of IgG receptor IIb
10525	1.47E-10	2.00E-11	-9.6611144	15.90189	-1.20452932	ERI1	exoribonuclease 1
1178	1.07E-10	1.42E-11	8.4102561	15.89547	1.45104276	GNG11	G protein subunit gamma 11
5810	2.07E-10	2.92E-11	-11.4811732	15.87459	-2.46249273	TEX35	testis expressed 35
20808	1.19E-10	1.58E-11	8.4519357	15.8345	1.20883533	GIMAP1	GTPase, IMAP family member 1
12901	1.37E-10	1.85E-11	-9.0709918	15.81405	-1.4401552	CCER1	coiled-coil glutamate rich protein 1
2437	1.13E-10	1.50E-11	8.3958422	15.81385	1.22380189	DPT	dermatopontin
8265	1.49E-10	2.04E-11	-8.5010306	15.81055	-1.77556239	PRM2	protamine 2
7667	1.34E-10	1.80E-11	-8.719966	15.76448	-1.68777534	MTFR2	mitochondrial fission regulator 2
5078	1.19E-10	1.58E-11	8.316249	15.73987	1.02528587	CYP1B1	cytochrome P450 family 1 subfamily B member 1
8619	1.53E-10	2.09E-11	-9.1038266	15.73218	-1.1439153	ZNF610	zinc finger protein 610
3878	1.21E-10	1.62E-11	8.341832	15.72503	1.26783954	C1orf115	chromosome 1 open reading frame 115
8149	1.23E-10	1.64E-11	8.3064232	15.70187	1.14426599	LAYN	layilin
20088	1.28E-10	1.71E-11	8.3268225	15.69486	1.14836062	TSHZ2	teashirt zinc finger homeobox 2
17194	1.87E-10	2.61E-11	-9.7957517	15.68853	-2.32931102	DPY19L2	dpy-19 like 2
11407	1.35E-10	1.82E-11	8.3118924	15.63767	1.03807775	PTPRK	protein tyrosine phosphatase, receptor type K
113	1.74E-10	2.42E-11	-9.1314576	15.62808	-1.36833954	FAM187A	family with sequence similarity 187 member A
2697	1.45E-10	1.97E-11	8.5103799	15.59705	1.28525969	NR2F2	nuclear receptor subfamily 2 group F member 2
5197	2.56E-10	3.70E-11	-11.0772409	15.59651	-3.16704156	GALNTL5	polypeptide N-acetylgalactosaminyltransferase-like 5
3526	2.24E-10	3.19E-11	-10.1378056	15.57492	-1.38647684	CDK19	cyclin dependent kinase 19
8800	1.45E-10	1.96E-11	8.291833	15.53339	1.07104583	CX3CL1	C-X3-C motif chemokine ligand 1
13174	1.53E-10	2.10E-11	8.2746759	15.49507	1.28808498	SLC16A2	solute carrier family 16 member 2
5050	2.75E-10	3.99E-11	-10.7962227	15.48469	-1.76765487	TTC16	tetratricopeptide repeat domain 16
1613	1.52E-10	2.08E-11	8.244721	15.46312	1.3580844	HLA-DMB	major histocompatibility complex, class II, DM beta
9269	1.73E-10	2.40E-11	-8.5413243	15.44995	-1.04141015	FUT10	fucosyltransferase 10
16809	1.56E-10	2.15E-11	8.2684109	15.44358	1.08647624	LAMB1	laminin subunit beta 1
15824	2.05E-10	2.90E-11	-8.8607231	15.36733	-1.30565445	HSF2BP	heat shock transcription factor 2 binding protein
18262	3.31E-10	4.87E-11	-11.198158	15.36072	-2.03143054	MROH2B	maestro heat like repeat family member 2B
17215	3.43E-10	5.06E-11	-11.4731608	15.36068	-2.75470019	TEX26	testis expressed 26
7420	1.73E-10	2.39E-11	-8.2728499	15.34689	-2.86350945	STK31	serine/threonine kinase 31
7471	1.75E-10	2.43E-11	-8.268839	15.33165	-2.20135772	SYCP3	synaptonemal complex protein 3
13142	2.98E-10	4.37E-11	-10.3405055	15.32338	-1.07989243	ZNF608	zinc finger protein 608
20514	3.47E-10	5.12E-11	-10.907093	15.2782	-1.14501895	CCDC170	coiled-coil domain containing 170
8711	1.87E-10	2.62E-11	-8.1862714	15.23683	-1.00477083	POC1A	POC1 centriolar protein A
9002	1.94E-10	2.73E-11	8.2059641	15.20402	1.31173512	IGF1	insulin like growth factor 1
1206	2.12E-10	3.00E-11	-8.3937903	15.17705	-1.47606615	TACC3	transforming acidic coiled-coil containing protein 3
21982	2.47E-10	3.57E-11	-8.4295999	15.08505	-1.04114957	CCNB1	cyclin B1
11468	2.37E-10	3.40E-11	-8.2479031	15.01912	-1.96282648	CDCA5	cell division cycle associated 5
7158	2.37E-10	3.39E-11	-8.1814004	14.99924	-2.15733482	MEI1	meiotic double-stranded break formation protein 1
17395	2.47E-10	3.56E-11	8.1372415	14.94021	1.13586822	FN1	fibronectin 1
11603	2.48E-10	3.58E-11	8.1055776	14.92423	1.02059685	ADAMTS5	ADAM metallopeptidase with thrombospondin type 1 motif 5
8662	3.82E-10	5.70E-11	-9.3779203	14.88034	-1.0431712	DNAJC27	DnaJ heat shock protein family (Hsp40) member C27
2366	2.92E-10	4.26E-11	8.2220698	14.83011	1.02811696	CASP5	caspase 5
22392	4.91E-10	7.48E-11	-10.0945663	14.80941	-1.40954983	LDHAL6A	lactate dehydrogenase A like 6A
11211	3.14E-10	4.60E-11	-8.2381146	14.74011	-1.12209251	MALT1	MALT1 paracaspase
9337	5.96E-10	9.23E-11	-10.8501238	14.72055	-1.88743937	LINC00588	long intergenic non-protein coding RNA 588
15901	3.06E-10	4.48E-11	-8.077816	14.71196	-1.00212236	HAUS8	HAUS augmin like complex subunit 8
8738	4.95E-10	7.55E-11	-9.7693582	14.70942	-1.40571342	TDRP	testis development related protein
444	3.45E-10	5.10E-11	8.1739404	14.62563	1.29834434	NSG1	neuron specific gene family member 1
11333	3.57E-10	5.29E-11	-8.1641947	14.58962	-1.25863069	PHF8	PHD finger protein 8
14259	7.91E-10	1.26E-10	-12.003919	14.57316	-2.32184866	BRIP1	BRCA1 interacting protein C-terminal helicase 1
8493	3.72E-10	5.52E-11	8.0234508	14.50305	1.22363158	MT1M	metallothionein 1M
13518	6.74E-10	1.06E-10	-9.7764587	14.49577	-2.05553957	TSSK3	testis specific serine kinase 3
18371	4.31E-10	6.48E-11	-8.3480812	14.48853	-1.96087584	CCNO	cyclin O
2156	3.98E-10	5.95E-11	-8.0982336	14.48769	-1.00428725	AKAP3	A-kinase anchoring protein 3
1302	5.52E-10	8.50E-11	-9.1264904	14.43756	-2.85259627	SPANXA1	sperm protein associated with the nucleus, X-linked, family member A1
8789	4.91E-10	7.49E-11	-8.5067733	14.4036	-1.25573779	ANLN	anillin actin binding protein
685	4.52E-10	6.84E-11	-8.0287433	14.31066	-1.11123005	SLC25A2	solute carrier family 25 member 2
14021	4.72E-10	7.16E-11	8.0166664	14.26508	1.11447307	SERPING1	serpin family G member 1
12932	4.96E-10	7.57E-11	7.9712044	14.19894	1.17784412	ADCY3	adenylate cyclase 3
8671	4.98E-10	7.61E-11	7.9122035	14.17441	1.22853947	RHOBTB3	Rho related BTB domain containing 3
19978	1.24E-09	2.06E-10	-13.9426887	14.17116	-1.15160004	MYO18B	myosin XVIIIB
9608	5.14E-10	7.87E-11	7.9612597	14.16105	1.06020982	GSTP1	glutathione S-transferase pi 1
3721	5.14E-10	7.87E-11	7.9317025	14.1503	1.16082514	HLA-DPB1	major histocompatibility complex, class II, DP beta 1
22506	5.63E-10	8.69E-11	7.9655827	14.13082	1.11762697	SMIM3	small integral membrane protein 3
21885	6.05E-10	9.39E-11	-7.9765288	14.06363	-1.68661161	TEX101	testis expressed 101
19783	6.37E-10	9.92E-11	7.9947207	14.05403	1.06803357	HTRA3	HtrA serine peptidase 3
9923	1.02E-09	1.67E-10	-9.9050762	14.01471	-2.93526135	ARMC3	armadillo repeat containing 3
902	1.20E-09	1.98E-10	-10.2147621	13.91426	-1.46154087	PDYN	prodynorphin
9821	6.38E-10	9.94E-11	7.8438045	13.90901	1.49318788	LSP1	lymphocyte-specific protein 1
6133	6.41E-10	1.00E-10	-7.842251	13.90298	-1.49281975	HIST2H2AA3	histone cluster 2, H2aa3
15365	1.60E-09	2.73E-10	-14.5336932	13.89794	-1.1005787	STMN2	stathmin 2
19301	6.67E-10	1.04E-10	7.8312465	13.86028	1.23281862	MGC24103	uncharacterized MGC24103
17745	7.04E-10	1.11E-10	7.8714473	13.81865	1.52958757	RARRES2	retinoic acid receptor responder 2
18686	7.38E-10	1.17E-10	-7.8025101	13.74875	-1.52543691	SMC1B	structural maintenance of chromosomes 1B
19158	8.40E-10	1.35E-10	-8.1807059	13.74732	-1.40154225	LGR6	leucine rich repeat containing G protein-coupled receptor 6
16360	1.25E-09	2.08E-10	-9.4842301	13.72332	-1.29334905	SPAG17	sperm associated antigen 17
1596	9.74E-10	1.59E-10	-7.9714889	13.65732	-1.10682347	GABPB1	GA binding protein transcription factor beta subunit 1
17085	8.29E-10	1.33E-10	7.7968415	13.63145	1.07667302	ANXA1	annexin A1
6322	1.23E-09	2.04E-10	-8.9009039	13.6186	-1.66215292	CEP44	centrosomal protein 44
12440	9.08E-10	1.47E-10	-7.8275386	13.57861	-1.0253326	CTNNA2	catenin alpha 2
10818	1.30E-09	2.17E-10	-8.8786379	13.52201	-2.33277695	PPP1R2P9	protein phosphatase 1 regulatory inhibitor subunit 2 pseudogene 9
1175	9.78E-10	1.59E-10	7.806104	13.49762	1.28856429	CILP	cartilage intermediate layer protein
21706	1.66E-09	2.83E-10	-9.6623208	13.49466	-2.07715337	DNAAF1	dynein axonemal assembly factor 1
17495	9.97E-10	1.63E-10	7.771742	13.43832	1.29164334	PLPP3	phospholipid phosphatase 3
483	1.08E-09	1.77E-10	-7.7777705	13.36245	-1.30942412	KNTC1	kinetochore associated 1
11263	1.70E-09	2.90E-10	-8.9731062	13.3182	-1.41240103	SMC2	structural maintenance of chromosomes 2
18303	1.22E-09	2.02E-10	7.773246	13.24442	1.04723686	SMOC2	SPARC related modular calcium binding 2
16881	1.22E-09	2.02E-10	7.7725576	13.24184	1.41165594	SEPP1	selenoprotein P, plasma, 1
13835	1.34E-09	2.24E-10	-7.8759705	13.21359	-1.32748009	OLIG1	oligodendrocyte transcription factor 1
8657	1.86E-09	3.21E-10	-8.9345793	13.20019	-1.91763515	MPP6	membrane palmitoylated protein 6
22220	2.64E-09	4.72E-10	-10.4931097	13.18058	-2.9420568	HEMGN	hemogen
11563	1.31E-09	2.19E-10	7.641734	13.12465	1.06752188	HLA-DRB3	major histocompatibility complex, class II, DR beta 3
17226	1.35E-09	2.27E-10	-7.6319144	13.08653	-1.27160814	PCDH17	protocadherin 17
19012	1.41E-09	2.38E-10	7.6455092	13.07775	1.07630595	SLCO2B1	solute carrier organic anion transporter family member 2B1
20858	1.80E-09	3.10E-10	7.8976512	13.02705	1.3058201	CXCL12	C-X-C motif chemokine ligand 12
21170	1.66E-09	2.84E-10	7.68214	12.96241	1.27649962	GPNMB	glycoprotein nmb
19323	1.53E-09	2.59E-10	7.5982613	12.95589	1.07159788	HLA-DQB1	major histocompatibility complex, class II, DQ beta 1
8741	1.57E-09	2.67E-10	-7.5910074	12.92773	-1.07821702	IQCA1	IQ motif containing with AAA domain 1
12587	1.97E-09	3.43E-10	7.6042362	12.73441	1.13293543	MS4A4A	membrane spanning 4-domains A4A
1818	4.20E-09	7.81E-10	-10.4938965	12.71949	-1.61067931	NUP58	nucleoporin 58
14926	4.41E-09	8.24E-10	-10.7835206	12.70627	-1.48430483	ANKS1B	ankyrin repeat and sterile alpha motif domain containing 1B
3841	3.06E-09	5.52E-10	-8.8322696	12.68359	-1.20641571	DRC3	dynein regulatory complex subunit 3
13370	2.05E-09	3.58E-10	7.5933299	12.66467	1.17841652	FTL	ferritin light chain
10978	2.65E-09	4.74E-10	-8.0999841	12.61044	-1.10059677	SLC51B	solute carrier family 51 beta subunit
8302	2.21E-09	3.88E-10	7.4947538	12.55409	1.24342918	ABI3BP	ABI family member 3 binding protein
10593	2.33E-09	4.12E-10	7.5296991	12.51444	1.40664238	METTL7A	methyltransferase like 7A
22508	3.25E-09	5.91E-10	-8.3513589	12.51113	-2.72000798	DAW1	dynein assembly factor with WD repeats 1
4521	3.94E-09	7.29E-10	-9.0904762	12.49815	-1.22854261	CNTN4	contactin 4
5364	2.41E-09	4.27E-10	-7.5202174	12.47824	-2.06223561	DAZL	deleted in azoospermia like
3103	4.23E-09	7.87E-10	-9.2027578	12.45595	-2.0597363	CPXCR1	CPX chromosome region, candidate 1
1618	2.54E-09	4.53E-10	-7.5312514	12.42972	-1.17478198	DTL	denticleless E3 ubiquitin protein ligase homolog
13842	5.72E-09	1.10E-09	-10.6062801	12.42129	-1.26668468	PAPOLB	poly(A) polymerase beta
19913	6.58E-09	1.27E-09	-11.7555787	12.39674	-1.59771494	CYB5D1	cytochrome b5 domain containing 1
19060	3.79E-09	6.97E-10	-8.4533548	12.37036	-1.45405103	CCDC144A	coiled-coil domain containing 144A
18568	5.39E-09	1.03E-09	-9.8184581	12.34795	-2.29106174	C4orf22	chromosome 4 open reading frame 22
21587	3.31E-09	6.02E-10	-7.5114319	12.2638	-1.63804562	IL23A	interleukin 23 subunit alpha
6834	4.40E-09	8.22E-10	-8.5749986	12.25652	-1.87738979	RALGPS2	Ral GEF with PH domain and SH3 binding motif 2
3809	4.80E-09	9.02E-10	-8.8690999	12.25126	-1.23260374	ARL5B	ADP ribosylation factor like GTPase 5B
9438	3.10E-09	5.59E-10	7.4501425	12.21071	1.22269016	ECM2	extracellular matrix protein 2
1942	3.35E-09	6.09E-10	7.4278102	12.15449	1.29756373	C1QB	complement C1q B chain
10327	3.41E-09	6.22E-10	-7.4479526	12.14319	-1.28864479	PIWIL1	piwi like RNA-mediated gene silencing 1
21770	4.89E-09	9.23E-10	-8.1971815	12.12186	-1.19098206	CNTRL	centriolin
8925	3.83E-09	7.06E-10	-7.7000013	12.12061	-1.2092957	GPSM2	G-protein signaling modulator 2
4766	3.39E-09	6.19E-10	7.3755379	12.09145	1.04325644	ANGPTL4	angiopoietin like 4
8045	3.67E-09	6.73E-10	-7.5402274	12.07849	-2.04031264	DMRTC2	DMRT like family C2
7176	6.80E-09	1.32E-09	-9.4787796	12.05083	-1.75748725	SPATA16	spermatogenesis associated 16
12304	3.53E-09	6.45E-10	7.3648954	12.05016	1.16881396	S100A4	S100 calcium binding protein A4
15926	7.93E-09	1.56E-09	-10.0910093	12.01803	-2.03263233	TEKT3	tektin 3
10744	3.75E-09	6.89E-10	-7.3478476	11.98403	-1.15695021	CSRP2	cysteine and glycine rich protein 2
4602	3.77E-09	6.94E-10	7.3461181	11.97732	1.09268422	PQLC3	PQ loop repeat containing 3
20428	8.88E-09	1.77E-09	-10.3121488	11.94339	-2.4267068	C12orf50	chromosome 12 open reading frame 50
20903	4.10E-09	7.61E-10	7.3951417	11.94339	1.11101155	VIT	vitrin
17003	6.46E-09	1.25E-09	-8.6196815	11.89225	-2.09818087	CEP55	centrosomal protein 55
12382	6.07E-09	1.17E-09	-8.4417684	11.88709	-2.17649206	SIGLECL1	SIGLEC family like 1
10306	6.39E-09	1.24E-09	-8.420364	11.86484	-1.91002416	C11orf70	chromosome 11 open reading frame 70
7571	4.58E-09	8.59E-10	-7.3145406	11.77486	-1.03672019	SKA3	spindle and kinetochore associated complex subunit 3
10533	4.86E-09	9.16E-10	7.321817	11.7501	1.17444116	MRI1	methylthioribose-1-phosphate isomerase 1
5788	8.94E-09	1.79E-09	-9.3304118	11.74737	-1.9920289	HSFY2	heat shock transcription factor, Y-linked 2
6985	4.87E-09	9.18E-10	7.3458107	11.72778	1.30997303	NDRG2	NDRG family member 2
10537	5.13E-09	9.73E-10	7.3561587	11.70873	1.099332	HSD11B2	hydroxysteroid 11-beta dehydrogenase 2
16967	5.19E-09	9.86E-10	-7.4362666	11.69916	-1.487014	PIK3R3	phosphoinositide-3-kinase regulatory subunit 3
9639	5.14E-09	9.75E-10	7.3054943	11.65855	1.00970007	CSF1R	colony stimulating factor 1 receptor
21562	5.64E-09	1.08E-09	-7.3829169	11.65842	-1.52490497	AREG	amphiregulin
13107	6.84E-09	1.33E-09	-7.8825977	11.61429	-1.41206136	IFT81	intraflagellar transport 81
5300	5.48E-09	1.04E-09	7.241501	11.57162	1.38531175	HS3ST1	heparan sulfate-glucosamine 3-sulfotransferase 1
3490	6.73E-09	1.31E-09	-7.5597659	11.4941	-3.067902	DDX4	DEAD-box helicase 4
15993	6.25E-09	1.21E-09	-7.2501182	11.47663	-1.12125339	HIST1H2AK	histone cluster 1, H2ak
7364	6.92E-09	1.35E-09	7.3804843	11.39918	1.25435061	DCN	decorin
16039	6.77E-09	1.32E-09	7.1823214	11.34226	1.08396669	SCARA5	scavenger receptor class A member 5
8687	7.07E-09	1.38E-09	7.1699335	11.29426	1.18410312	ATP1A2	ATPase Na+/K+ transporting subunit alpha 2
8650	7.28E-09	1.43E-09	-7.1617806	11.26268	-1.24732471	MEIOB	meiosis specific with OB domains
21889	8.07E-09	1.60E-09	-7.2503102	11.25828	-1.29147696	ZCWPW1	zinc finger CW-type and PWWP domain containing 1
3979	8.01E-09	1.58E-09	7.1564754	11.19673	1.26724291	NR2F1	nuclear receptor subfamily 2 group F member 1
17146	7.90E-09	1.56E-09	7.1832344	11.19208	1.30141762	C1QA	complement C1q A chain
17038	8.98E-09	1.80E-09	7.396103	11.17695	1.31155007	CD53	CD53 molecule
5980	8.28E-09	1.64E-09	-7.1472943	11.13164	-1.14423035	PBX4	PBX homeobox 4
17377	8.63E-09	1.72E-09	7.1578378	11.1248	1.1180114	TRIM22	tripartite motif containing 22
5760	8.29E-09	1.65E-09	-7.1250909	11.12056	-1.13852405	SPINT2	serine peptidase inhibitor, Kunitz type 2
14263	8.78E-09	1.75E-09	7.2005288	11.09606	1.15427155	B2M	beta-2-microglobulin
15414	1.45E-08	3.04E-09	-8.6130724	11.09604	-2.77809736	SLCO6A1	solute carrier organic anion transporter family member 6A1
9732	8.79E-09	1.75E-09	7.1303672	11.06658	1.09566091	FHL2	four and a half LIM domains 2
6249	1.33E-08	2.76E-09	-7.961204	10.99117	-1.78980756	PSMA8	proteasome subunit alpha 8
5907	1.26E-08	2.61E-09	-7.7210592	10.94063	-1.84957824	IL13RA2	interleukin 13 receptor subunit alpha 2
17816	1.00E-08	2.03E-09	-7.0714505	10.91289	-1.18883468	RECQL4	RecQ like helicase 4
6658	1.69E-08	3.60E-09	-7.5127031	10.83799	-1.19299215	COX7A2	cytochrome c oxidase subunit 7A2
9042	1.10E-08	2.25E-09	7.045092	10.81088	1.23641481	INHBA	inhibin beta A subunit
13555	2.99E-08	6.72E-09	-10.144982	10.70946	-2.08381799	ADAM20	ADAM metallopeptidase domain 20
11667	1.31E-08	2.72E-09	6.9967466	10.62386	1.48778797	IGFBP6	insulin like growth factor binding protein 6
22015	1.62E-08	3.43E-09	7.096862	10.59792	1.16083759	PDGFRA	platelet derived growth factor receptor alpha
19025	1.37E-08	2.85E-09	7.0047191	10.58399	1.16420997	ADAP2	ArfGAP with dual PH domains 2
18702	1.36E-08	2.83E-09	6.9860916	10.58266	1.27799115	RBP1	retinol binding protein 1
12910	1.47E-08	3.08E-09	7.0058986	10.546	1.04445871	GSTA4	glutathione S-transferase alpha 4
13613	1.52E-08	3.21E-09	-6.9951627	10.47525	-3.08821184	VCX3A	variable charge, X-linked 3A
15955	4.01E-08	9.30E-09	-9.6171394	10.33458	-1.98942187	COX7B2	cytochrome c oxidase subunit 7B2
13363	3.69E-08	8.49E-09	-9.1535875	10.3207	-1.10778189	PIP4K2A	phosphatidylinositol-5-phosphate 4-kinase type 2 alpha
395	1.99E-08	4.32E-09	-7.1793569	10.31778	-1.00140177	EXO1	exonuclease 1
19019	3.94E-08	9.11E-09	-9.1157344	10.2521	-3.17240187	CAPZA3	capping actin protein of muscle Z-line alpha subunit 3
4184	2.68E-08	5.96E-09	-7.6242717	10.1969	-1.1528312	UNC45B	unc-45 myosin chaperone B
16754	3.86E-08	8.91E-09	-8.7298708	10.19412	-1.31094187	CNGB3	cyclic nucleotide gated channel beta 3
16185	5.01E-08	1.19E-08	-9.7776294	10.14451	-2.30462056	ABRA	actin binding Rho activating protein
10020	4.28E-08	1.00E-08	-8.8580624	10.10663	-1.49153578	BTG4	BTG anti-proliferation factor 4
4889	4.44E-08	1.04E-08	-8.8375057	10.06586	-2.31173275	ARMC4	armadillo repeat containing 4
2747	3.04E-08	6.83E-09	-7.3576561	9.98063	-1.11801635	FGF9	fibroblast growth factor 9
12260	2.50E-08	5.54E-09	-6.8529088	9.93393	-1.02792559	HIST1H2AE	histone cluster 1, H2ae
5357	2.53E-08	5.59E-09	6.8112657	9.90751	1.09848113	PLTP	phospholipid transfer protein
9668	2.58E-08	5.72E-09	6.8447601	9.90295	1.6075123	HSD3B2	hydroxy-delta-5-steroid dehydrogenase, 3 beta- and steroid delta-isomerase 2
17360	6.55E-08	1.59E-08	-9.5943871	9.8508	-2.13837895	SPAM1	sperm adhesion molecule 1
8807	2.70E-08	6.03E-09	6.7920358	9.83337	1.3432648	PLEK2	pleckstrin 2
19093	3.43E-08	7.82E-09	7.1085703	9.82978	1.08849884	GPM6B	glycoprotein M6B
11891	4.13E-08	9.62E-09	-7.6625968	9.77274	-2.68519202	SHCBP1L	SHC binding and spindle associated 1 like
5401	3.07E-08	6.91E-09	-6.8369092	9.7334	-2.19016813	DDX43	DEAD-box helicase 43
11082	5.73E-08	1.37E-08	-8.3633825	9.69697	-1.75431805	MCMDC2	minichromosome maintenance domain containing 2
16692	3.10E-08	6.99E-09	-6.7538685	9.68627	-1.65245347	HIST1H2BA	histone cluster 1, H2ba
16442	3.15E-08	7.12E-09	-6.7876785	9.68604	-1.56040702	ANKRD20A2	ankyrin repeat domain 20 family member A2
18429	3.72E-08	8.56E-09	-7.1181145	9.66565	-1.90849004	BUB1	BUB1 mitotic checkpoint serine/threonine kinase
8996	3.19E-08	7.22E-09	6.7456519	9.65461	1.2994194	MT1E	metallothionein 1E
4260	3.20E-08	7.24E-09	6.7448786	9.65163	1.08859487	MT1B	metallothionein 1B
12876	3.20E-08	7.26E-09	6.7444366	9.64993	1.00578133	HLA-DRB5	major histocompatibility complex, class II, DR beta 5
11198	5.58E-08	1.33E-08	-7.9912842	9.61174	-2.8849272	ADAM2	ADAM metallopeptidase domain 2
790	9.77E-08	2.45E-08	-11.056335	9.5993	-1.63964839	LIN7C	lin-7 homolog C, crumbs cell polarity complex component
11436	3.39E-08	7.71E-09	6.7473252	9.59768	1.25374825	ITM2A	integral membrane protein 2A
9125	6.50E-08	1.58E-08	-8.161253	9.51786	-1.4173151	ARL6	ADP ribosylation factor like GTPase 6
522	4.24E-08	9.88E-09	6.7421334	9.48062	1.08230461	RTP4	receptor transporter protein 4
12444	3.88E-08	8.96E-09	6.6902132	9.44117	1.52451705	LUM	lumican
22537	4.55E-08	1.07E-08	-6.7875373	9.42976	-1.0385096	WDR48	WD repeat domain 48
4034	4.21E-08	9.81E-09	6.703944	9.39862	1.86592352	DAPL1	death associated protein like 1
2241	4.24E-08	9.89E-09	6.7019066	9.39089	1.38164433	PROK1	prokineticin 1
18925	7.48E-08	1.83E-08	-7.9715509	9.34084	-2.28314048	DEPDC7	DEP domain containing 7
12771	4.63E-08	1.09E-08	-6.6400004	9.24805	-1.8841727	TKTL1	transketolase like 1
10872	1.46E-07	3.77E-08	-12.1633789	9.23883	-1.75830477	DNAJC28	DnaJ heat shock protein family (Hsp40) member C28
17057	4.92E-08	1.16E-08	6.6406451	9.19008	1.21421602	STAT6	signal transducer and activator of transcription 6
15777	5.34E-08	1.27E-08	6.6755696	9.16031	1.30025629	SFRP1	secreted frizzled related protein 1
10650	5.62E-08	1.34E-08	6.6607019	9.13869	1.09965397	ECSCR	endothelial cell surface expressed chemotaxis and apoptosis regulator
21975	1.36E-07	3.48E-08	-9.4201351	9.12143	-1.71524188	LNX1	ligand of numb-protein X 1
15321	1.59E-07	4.15E-08	-10.6055196	9.09125	-1.39668849	ADAM18	ADAM metallopeptidase domain 18
20998	6.89E-08	1.68E-08	-6.8198655	9.04612	-1.17545413	SPC25	SPC25, NDC80 kinetochore complex component
16372	5.63E-08	1.35E-08	6.6029119	9.04611	1.14033198	FBP1	fructose-bisphosphatase 1
9448	5.77E-08	1.38E-08	6.5956327	9.01835	1.31308245	SLITRK4	SLIT and NTRK like family member 4
17750	6.12E-08	1.48E-08	6.6161047	9.00292	1.0515071	TBC1D9	TBC1 domain family member 9
16209	6.26E-08	1.51E-08	6.5911965	8.97156	1.30478232	SLC40A1	solute carrier family 40 member 1
129	1.52E-07	3.94E-08	-9.0350265	8.94546	-1.66886327	ETV1	ETS variant 1
16325	6.33E-08	1.53E-08	6.5883258	8.93006	1.19942376	CFD	complement factor D
13042	6.57E-08	1.59E-08	6.5770502	8.88738	1.17070066	S100A13	S100 calcium binding protein A13
19865	8.34E-08	2.06E-08	6.5277269	8.70551	1.03426894	DHRS7	dehydrogenase/reductase 7
17099	1.08E-07	2.73E-08	-7.1632534	8.67917	-2.19139041	NUF2	NUF2, NDC80 kinetochore complex component
531	1.10E-07	2.79E-08	-7.1001691	8.65439	-1.86376958	POTED	POTE ankyrin domain family member D
20355	2.10E-07	5.62E-08	-8.574578	8.52626	-2.90743484	PLCZ1	phospholipase C zeta 1
17530	9.54E-08	2.38E-08	-6.548036	8.5254	-1.12289145	ASPM	abnormal spindle microtubule assembly
6351	9.39E-08	2.34E-08	6.4424289	8.49028	1.16096902	P3H2	prolyl 3-hydroxylase 2
9952	1.55E-07	4.04E-08	-7.445669	8.46472	-1.0509533	DEPDC4	DEP domain containing 4
3269	1.79E-07	4.70E-08	-7.8067151	8.45931	-1.11247985	MCOLN2	mucolipin 2
1424	1.01E-07	2.53E-08	6.4565893	8.43209	1.26047355	MT1X	metallothionein 1X
17357	1.16E-07	2.93E-08	6.4010388	8.27793	1.24641968	VSX1	visual system homeobox 1
19879	1.36E-07	3.48E-08	-6.556893	8.20318	-1.5654247	RAD54L	RAD54-like (S. cerevisiae)
5695	1.28E-07	3.27E-08	6.3725072	8.20091	1.39002936	GRK5	G protein-coupled receptor kinase 5
572	2.15E-07	5.78E-08	-7.3933096	8.13705	-1.7816069	BNC1	basonuclin 1
21592	1.55E-07	4.04E-08	6.4056818	8.10636	1.08296935	HLF	HLF, PAR bZIP transcription factor
16782	1.51E-07	3.91E-08	6.3952429	8.09114	1.12782804	SLC22A3	solute carrier family 22 member 3
8046	1.38E-07	3.55E-08	6.3345559	8.07816	1.1793756	MT1H	metallothionein 1H
6714	3.22E-07	8.96E-08	-8.1156106	8.00315	-1.21423172	TAF13	TATA-box binding protein associated factor 13
15230	3.29E-07	9.19E-08	-7.9266827	7.92355	-2.16420561	DCDC2	doublecortin domain containing 2
21316	1.81E-07	4.78E-08	-6.360177	7.90158	-1.07979611	CCNYL1	cyclin Y like 1
16148	3.58E-07	1.01E-07	-8.0552368	7.88589	-1.12859209	TFAP2B	transcription factor AP-2 beta
14895	1.77E-07	4.66E-08	6.2797042	7.84952	1.03604737	GBP3	guanylate binding protein 3
4166	1.73E-07	4.53E-08	6.2713825	7.83741	1.24314788	CYP11A1	cytochrome P450 family 11 subfamily A member 1
12566	3.76E-07	1.06E-07	-7.7021848	7.72527	-2.15734742	SPACA7	sperm acrosome associated 7
6146	4.53E-07	1.30E-07	-8.1126405	7.68316	-1.73366957	ABHD17B	abhydrolase domain containing 17B
3167	5.10E-07	1.48E-07	-8.5097917	7.6824	-1.37905607	TERF2	telomeric repeat binding factor 2
11717	2.35E-07	6.37E-08	-6.4101076	7.6445	-1.26603495	NLRP7	NLR family pyrin domain containing 7
21876	2.54E-07	6.93E-08	-6.4107476	7.64067	-3.19444196	VCX3B	variable charge, X-linked 3B
8242	2.12E-07	5.69E-08	-6.2430952	7.62842	-1.71865913	VCY	variable charge, Y-linked
18839	2.36E-07	6.38E-08	-6.1974174	7.50722	-2.92439951	VCX2	variable charge, X-linked 2
10743	2.40E-07	6.53E-08	6.1764684	7.4766	1.09325207	MYOC	myocilin
20138	2.44E-07	6.65E-08	6.1866669	7.46666	1.18359606	TPD52L1	tumor protein D52-like 1
14377	2.49E-07	6.78E-08	6.1669046	7.4403	1.19182305	CXCL13	C-X-C motif chemokine ligand 13
21941	4.14E-07	1.18E-07	-7.0287437	7.40656	-2.47645287	BRDT	bromodomain testis associated
6113	3.16E-07	8.78E-08	6.1288505	7.20037	1.45487076	CPM	carboxypeptidase M
6717	3.17E-07	8.80E-08	-6.1133365	7.19038	-1.25434128	PASD1	PAS domain containing 1
1744	3.28E-07	9.16E-08	6.1028611	7.15097	1.20929844	PDE8B	phosphodiesterase 8B
12063	3.42E-07	9.60E-08	6.0904533	7.10431	1.46131658	CHST7	carbohydrate sulfotransferase 7
23	4.44E-07	1.27E-07	6.0456004	6.87326	1.04382805	FADS1	fatty acid desaturase 1
13999	4.74E-07	1.37E-07	5.9977804	6.78834	1.26129023	IGFBP5	insulin like growth factor binding protein 5
20762	4.85E-07	1.40E-07	-6.019871	6.74666	-1.1884333	GAGE4	G antigen 4
22380	1.59E-06	5.10E-07	-9.6086276	6.74407	-1.57010138	SLC25A41	solute carrier family 25 member 41
20106	6.29E-07	1.86E-07	-6.3874807	6.70197	-2.3708017	CDCA2	cell division cycle associated 2
5617	5.96E-07	1.75E-07	5.9914634	6.69712	1.59398947	CFI	complement factor I
4445	6.38E-07	1.88E-07	-6.3465391	6.66882	-2.53027053	HORMAD1	HORMA domain containing 1
14089	6.72E-07	2.00E-07	6.1522876	6.65801	1.04606035	HAND2-AS1	HAND2 antisense RNA 1 (head to head)
16623	1.19E-06	3.72E-07	-7.5571965	6.62713	-1.12239267	LRRC7	leucine rich repeat containing 7
7331	5.84E-07	1.71E-07	5.9384051	6.53425	1.69815695	CALB2	calbindin 2
1677	1.02E-06	3.15E-07	-6.8010485	6.46908	-1.49874887	ABCC11	ATP binding cassette subfamily C member 11
10277	1.43E-06	4.52E-07	-7.4557161	6.42959	-1.15129479	FBXO36	F-box protein 36
8039	6.53E-07	1.93E-07	-5.9339913	6.42929	-2.14654051	CT47A11	cancer/testis antigen family 47, member A11
635	7.27E-07	2.17E-07	5.9327427	6.36271	1.14033881	MT1G	metallothionein 1G
4147	1.80E-06	5.82E-07	-7.7035268	6.30846	-2.05549431	ADGB	androglobin
17474	7.31E-07	2.18E-07	-5.8610389	6.28645	-1.3911835	MAGEA2B	MAGE family member A2B
14165	7.55E-07	2.26E-07	-5.9064407	6.28244	-1.27832283	CDT1	chromatin licensing and DNA replication factor 1
954	9.50E-07	2.90E-07	6.1475676	6.26184	1.4071512	WISP2	WNT1 inducible signaling pathway protein 2
22127	8.61E-07	2.61E-07	5.8539474	6.20184	1.05048191	HSD17B3	hydroxysteroid 17-beta dehydrogenase 3
18499	1.02E-06	3.14E-07	-6.1233063	6.12885	-1.24395432	HOXA7	homeobox A7
18156	1.66E-06	5.33E-07	-6.7568361	6.0259	-1.83704616	TTK	TTK protein kinase
5626	9.61E-07	2.93E-07	5.7958615	6.003	1.12688362	APOE	apolipoprotein E
21954	1.19E-06	3.71E-07	5.8020876	5.91848	1.12900312	TMEM37	transmembrane protein 37
4748	1.05E-06	3.23E-07	5.7831045	5.91544	1.10508282	FDX1	ferredoxin 1
1455	1.10E-06	3.40E-07	5.7697225	5.86607	1.26881486	PRPS2	phosphoribosyl pyrophosphate synthetase 2
18587	1.64E-06	5.28E-07	-6.2445482	5.78337	-2.24450053	SLC25A31	solute carrier family 25 member 31
5278	1.23E-06	3.84E-07	-5.7124241	5.73124	-1.03241669	ATP8A2	ATPase phospholipid transporting 8A2
7075	2.36E-06	7.77E-07	-6.6904063	5.68689	-1.26784378	SNX16	sorting nexin 16
134	1.31E-06	4.14E-07	-5.7172438	5.67275	-1.1856899	AK5	adenylate kinase 5
10335	1.53E-06	4.90E-07	5.7725104	5.6696	1.34369118	BHMT2	betaine--homocysteine S-methyltransferase 2
9095	1.33E-06	4.17E-07	5.6904025	5.64931	1.36968808	SLC16A9	solute carrier family 16 member 9
7110	1.34E-06	4.21E-07	-5.6878488	5.63981	-1.0423324	DUSP5	dual specificity phosphatase 5
16543	3.66E-06	1.25E-06	-7.2751505	5.54198	-1.31046976	ARAP2	ArfGAP with RhoGAP domain, ankyrin repeat and PH domain 2
18357	3.44E-06	1.17E-06	-7.1298518	5.53589	-1.50505461	TTC26	tetratricopeptide repeat domain 26
2619	4.83E-06	1.68E-06	-8.1668721	5.52026	-1.45447156	C6orf118	chromosome 6 open reading frame 118
669	2.10E-06	6.87E-07	-6.1107867	5.49842	-1.26432724	MAD2L1	MAD2 mitotic arrest deficient-like 1 (yeast)
16394	1.66E-06	5.35E-07	5.6737537	5.46615	1.43265515	PAPSS2	3'-phosphoadenosine 5'-phosphosulfate synthase 2
1145	4.18E-06	1.44E-06	-9.274997	5.43827	-1.64186553	SGMS2	sphingomyelin synthase 2
2822	4.07E-06	1.40E-06	-7.2111688	5.4253	-2.40600846	ADAM30	ADAM metallopeptidase domain 30
1993	5.04E-06	1.76E-06	-7.7932899	5.38325	-1.08336895	CFAP44	cilia and flagella associated protein 44
3601	1.74E-06	5.60E-07	5.6124653	5.36008	1.16885509	CSGALNACT1	chondroitin sulfate N-acetylgalactosaminyltransferase 1
5861	1.88E-06	6.08E-07	5.5907786	5.27981	1.00233579	AOC3	amine oxidase, copper containing 3
13029	1.94E-06	6.30E-07	-5.6045226	5.25913	-2.39378381	PAGE5	PAGE family member 5
7271	4.46E-06	1.54E-06	-6.835832	5.19208	-2.15722927	GSTTP1	glutathione S-transferase theta pseudogene 1
5096	2.07E-06	6.74E-07	5.5745286	5.18504	1.50837635	MGARP	mitochondria localized glutamic acid rich protein
20741	2.75E-06	9.17E-07	-5.8459494	5.12073	-2.02201316	NCAPG	non-SMC condensin I complex subunit G
2202	2.29E-06	7.51E-07	5.5570332	5.08557	1.18582958	MGST1	microsomal glutathione S-transferase 1
13394	2.32E-06	7.65E-07	-5.552295	5.06828	-2.08431243	TSPY2	testis specific protein, Y-linked 2
14792	2.83E-06	9.47E-07	-5.672391	4.96729	-1.0686626	CCNB3	cyclin B3
22261	8.99E-06	3.29E-06	-8.0574049	4.92621	-1.76873186	CCDC63	coiled-coil domain containing 63
2507	4.50E-06	1.56E-06	-6.2369297	4.88974	-1.54887381	NEK2	NIMA related kinase 2
12509	9.44E-06	3.47E-06	-8.0160291	4.87409	-1.54439599	SLC1A2	solute carrier family 1 member 2
8863	2.82E-06	9.42E-07	-5.474001	4.84925	-1.0519102	MAGEC2	MAGE family member C2
21021	6.34E-06	2.26E-06	-6.6489668	4.80876	-1.1711041	TRPM8	transient receptor potential cation channel subfamily M member 8
18943	1.01E-05	3.72E-06	-7.5971919	4.75986	-1.65374027	ZNF264	zinc finger protein 264
8278	3.90E-06	1.34E-06	5.552959	4.71631	1.01477263	PSMB8	proteasome subunit beta 8
8626	3.39E-06	1.15E-06	-5.4654886	4.68305	-2.15715484	XAGE3	X antigen family member 3
21805	3.68E-06	1.26E-06	5.4532336	4.67116	1.14925122	EPHX1	epoxide hydrolase 1
4801	3.81E-06	1.30E-06	-5.5271674	4.62039	-1.04945335	FANCA	Fanconi anemia complementation group A
21398	1.08E-05	4.01E-06	-12.6020212	4.61627	-1.83268155	LIN54	lin-54 DREAM MuvB core complex component
2482	1.03E-05	3.81E-06	-6.8420136	4.49514	-1.72391514	ADAM6	ADAM metallopeptidase domain 6 (pseudogene)
20236	5.41E-06	1.90E-06	5.4342179	4.40747	1.12539943	VGLL3	vestigial like family member 3
9286	4.59E-06	1.59E-06	-5.3876729	4.37009	-1.941567	FGFR3	fibroblast growth factor receptor 3
8230	1.47E-05	5.56E-06	-8.0812566	4.29435	-1.43684429	INPP5A	inositol polyphosphate-5-phosphatase A
7718	5.01E-06	1.75E-06	5.3081374	4.24286	1.23789667	CYP17A1	cytochrome P450 family 17 subfamily A member 1
6327	5.37E-06	1.89E-06	5.3183912	4.22167	1.00993044	TCEA3	transcription elongation factor A3
2449	7.08E-06	2.55E-06	-5.5748183	4.14003	-1.27849425	RAD9B	RAD9 checkpoint clamp component B
6161	6.70E-06	2.40E-06	-5.3987831	4.08011	-1.13974964	CENPK	centromere protein K
2419	6.44E-06	2.30E-06	-5.3225509	4.03498	-1.06317625	SSX3	SSX family member 3
21535	6.81E-06	2.44E-06	5.2475383	4.00559	1.13510059	GLRX	glutaredoxin
14630	1.75E-05	6.73E-06	-6.7091233	3.9814	-1.56401465	SPZ1	spermatogenic leucine zipper 1
2746	8.20E-06	2.98E-06	-5.2485175	3.77846	-1.31773835	XAGE5	X antigen family member 5
6478	9.26E-06	3.39E-06	5.1376921	3.60047	1.09348385	LDLR	low density lipoprotein receptor
8536	9.81E-06	3.61E-06	5.1116819	3.53325	1.00729951	SC5D	sterol-C5-desaturase
15658	1.02E-05	3.77E-06	-5.1374123	3.51678	-1.0195379	NKX6-2	NK6 homeobox 2
5353	1.32E-05	4.95E-06	-5.0339907	3.23112	-1.36610682	CTAG1A	cancer/testis antigen 1A
21913	3.79E-05	1.55E-05	-6.4151135	3.20263	-1.74652085	INSL6	insulin like 6
15770	1.51E-05	5.72E-06	4.9941329	3.08993	1.10595402	EBP	emopamil binding protein (sterol isomerase)
22562	4.72E-05	1.97E-05	-6.4842184	3.0262	-1.37494754	NFXL1	nuclear transcription factor, X-box binding like 1
13326	2.28E-05	8.94E-06	5.1241547	2.84375	1.50750125	DLK1	delta like non-canonical Notch ligand 1
4910	2.33E-05	9.16E-06	-4.9862816	2.75334	-1.10335288	FNDC8	fibronectin type III domain containing 8
11302	6.45E-05	2.75E-05	-6.2728692	2.71915	-1.80771987	MYH1	myosin heavy chain 1
17023	2.44E-05	9.64E-06	-4.8493527	2.61447	-1.13253508	RHOXF2B	Rhox homeobox family member 2B
4304	8.14E-05	3.54E-05	-5.9319549	2.40261	-1.05966525	KLK12	kallikrein related peptidase 12
20460	9.70E-05	4.28E-05	-6.2183594	2.38346	-1.58210674	ANKRD55	ankyrin repeat domain 55
2699	3.10E-05	1.25E-05	4.7848686	2.36893	1.1102881	SLC39A8	solute carrier family 39 member 8
5158	3.76E-05	1.54E-05	-4.9502837	2.30782	-1.71887097	MND1	meiotic nuclear divisions 1
602	6.52E-05	2.79E-05	5.3181312	2.2839	1.47010368	CLEC2B	C-type lectin domain family 2 member B
14222	4.85E-05	2.03E-05	-5.0455241	2.18185	-1.69015504	TOP2A	topoisomerase (DNA) II alpha
5970	9.75E-05	4.30E-05	-5.8201146	2.17354	-1.14513733	XIRP2	xin actin binding repeat containing 2
9250	3.90E-05	1.60E-05	4.7466877	2.15009	1.1407605	GSTA2	glutathione S-transferase alpha 2
22463	4.10E-05	1.69E-05	4.731641	2.13633	1.11752299	SCARB1	scavenger receptor class B member 1
10428	3.90E-05	1.60E-05	-4.6999486	2.08114	-1.09939092	INHBB	inhibin beta B subunit
19217	0.00014	6.33E-05	-5.9624858	1.95198	-1.12033887	IQUB	IQ motif and ubiquitin domain containing
13196	4.62E-05	1.92E-05	4.6554325	1.90917	1.14946354	PGRMC1	progesterone receptor membrane component 1
22055	5.60E-05	2.37E-05	4.6339872	1.90057	1.3145734	HSD3B1	hydroxy-delta-5-steroid dehydrogenase, 3 beta- and steroid delta-isomerase 1
12265	0.000109	4.84E-05	-5.0289438	1.70523	-1.29548853	CCDC18	coiled-coil domain containing 18
11295	6.45E-05	2.76E-05	4.6551498	1.64549	1.01115658	S100A6	S100 calcium binding protein A6
5839	0.000105	4.65E-05	-4.9511585	1.53523	-1.48777972	SYCP2	synaptonemal complex protein 2
21435	7.24E-05	3.12E-05	4.5237979	1.47735	1.12254463	APOC1	apolipoprotein C1
7825	0.000241	0.000113	5.1614095	1.241	1.22175226	CMYA5	cardiomyopathy associated 5
2494	0.000414	0.000201	-6.971612	1.19869	-1.02790657	CCNT2	cyclin T2
12875	0.000117	5.22E-05	-4.5878948	1.16255	-1.12685462	UHRF1	ubiquitin like with PHD and ring finger domains 1
10318	0.000365	0.000176	-5.5118883	1.15517	-1.60682556	PDHA2	pyruvate dehydrogenase (lipoamide) alpha 2
19402	0.000346	0.000167	-5.7954372	1.14843	-1.49030991	KIF18A	kinesin family member 18A
11943	0.000106	4.71E-05	-4.5017514	1.13164	-1.41572747	RHOXF1	Rhox homeobox family member 1
12076	0.000121	5.41E-05	-4.5760649	1.12756	-1.12347473	TRIM36	tripartite motif containing 36
13031	0.000305	0.000145	-5.2772181	1.09574	-1.04947658	RGS6	regulator of G-protein signaling 6
7141	0.000109	4.84E-05	4.3908325	1.04729	1.27559668	DIRAS3	DIRAS family GTPase 3
21918	0.000139	6.30E-05	-4.5102203	0.99631	-1.54906154	FMR1NB	fragile X mental retardation 1 neighbor
8638	0.000114	5.10E-05	4.3757918	0.96299	1.35221565	HSD17B6	hydroxysteroid 17-beta dehydrogenase 6
11413	0.00013	5.85E-05	4.3356394	0.8637	1.02515595	SPRR2F	small proline rich protein 2F
17511	0.00041	0.000199	-5.0969517	0.86317	-2.57312374	PKIB	protein kinase (cAMP-dependent, catalytic) inhibitor beta
5778	0.00015	6.84E-05	-4.4071249	0.78913	-1.86088841	CT45A1	cancer/testis antigen family 45, member A1
18630	0.000171	7.82E-05	-4.3646461	0.65805	-1.87625425	PAGE1	PAGE family member 1
16301	0.000502	0.000248	-4.8574611	0.50742	-1.31612245	IGSF10	immunoglobulin superfamily member 10
19580	0.000208	9.65E-05	-4.2982921	0.45427	-1.10919769	EGR4	early growth response 4
2653	0.000599	3.00E-04	4.2814922	-0.03319	1.43262095	NPPB	natriuretic peptide B
10496	0.000525	0.00026	-4.2207722	-0.22225	-1.14459857	KRTDAP	keratinocyte differentiation associated protein
8590	0.000869	0.000447	-4.1520618	-0.59069	-1.01615583	ASZ1	ankyrin repeat, SAM and basic leucine zipper domain containing 1
1943	0.0034	0.00193	5.8440234	-0.67568	1.53714569	EXPH5	exophilin 5
21533	0.00129	0.000682	-4.0467007	-0.91279	-1.36636816	IL5	interleukin 5
21712	0.00595	0.00351	-6.0187668	-1.16135	-1.11982121	MGAT4C	MGAT4 family member C
650	0.00344	0.00194	-3.9358845	-1.16903	-1.68691339	ARL13A	ADP ribosylation factor like GTPase 13A
31	0.00105	0.000546	3.6845733	-1.21124	1.06724931	RSPO3	R-spondin 3
2542	0.000955	0.000495	3.6907208	-1.22062	1.01527026	PNPLA3	patatin like phospholipase domain containing 3
17297	0.00595	0.00351	5.1080411	-1.24355	1.05692877	PKHD1L1	polycystic kidney and hepatic disease 1 (autosomal recessive)-like 1
1812	0.00818	0.00494	-5.4908899	-1.45428	-1.10164704	CARD18	caspase recruitment domain family member 18
15226	0.00496	0.00289	-3.9016244	-1.45978	-1.63541441	TIGD4	tigger transposable element derived 4
9526	0.00157	0.000845	3.5822381	-1.57938	1.01104725	BAALC	brain and acute leukemia, cytoplasmic
14227	0.00398	0.00228	-3.6637927	-1.81346	-1.08302921	CCDC65	coiled-coil domain containing 65
6680	0.0143	0.00896	-5.8517166	-1.92805	-1.37693233	TRIM23	tripartite motif containing 23
12477	0.00831	0.00502	-3.4190677	-2.47646	-1.05946431	KNL1	kinetochore scaffold 1
3608	0.0185	0.0118	2.8602453	-2.96183	1.21970485	SPAG11B	sperm associated antigen 11B
12650	0.0234	0.0153	-2.5101197	-4.38612	-1.19815941	MLC1	megalencephalic leukoencephalopathy with subcortical cysts 1
